# Supplementary material for: Household Transmission of SARS-CoV-2: A Systematic Review and Meta-analysis
Source: PubMed Central journal article supplement (PMC7737089; doi:10.1001/jamanetworkopen.2020.31756), 2020-12-14
Supplement: jamanetwopen-e2031756-s001.pdf [file jamanetwopen-e2031756-s001.pdf]

## Supplemental Online Content

Madewell ZJ, Yang Y, Longini IM Jr, Halloran ME, Dean NE. Household transmission of SARS-CoV-2: a systematic review and meta-analysis. *JAMA Netw Open*. 2020;3(12):e2031756. doi:10.1001/jamanetworkopen.2020.31756

**eFigure 1.** PRISMA Flow Diagram for Review of Household Secondary Attack of SARS-CoV-2, MERS-CoV, SARS-CoV, and Other Coronaviruses

**eFigure 2.** Secondary Attack Rates of SARS-CoV-2 for Studies of Close Contacts

**eFigure 3.** Funnel Plots of Studies Reporting Secondary Attack Rates of SARS-CoV-2 for Household, Family, and Close Contacts

**eFigure 4.** Household Secondary Attack Rates of SARS-CoV-2, Restricted to Studies With Low or Moderate Risk of Bias as Determined by the Modified Newcastle-Ottawa Scale

**eFigure 5.** Household Secondary Attack Rates of SARS-CoV-2, Grouped by Studies in China vs Other Locations

**eFigure 6.** Secondary Attack Rates of SARS-CoV-2, Grouped by Studies That Tested Only Symptomatic Household Contacts and Studies That Tested All Household Contacts Irrespective of Symptoms

**eFigure 7.** Household Secondary Attack Rates of SARS-CoV-2, Grouped by Studies Early (January-February) and Later (March-July) in the Pandemic

**eFigure 8.** Secondary Attack Rates of SARS-CoV-2 From Symptomatic and Asymptomatic or Presymptomatic Index Cases to Household and Family Contacts

**eFigure 9.** Funnel Plots of Studies Reporting Household Secondary Attack Rates of SARS-CoV-2 for Adult ( $\geq 18$  Years) and Child ( $< 18$  Years) Contacts

**eFigure 10.** Secondary Attack Rates of SARS-CoV-2 for Household and Family Contacts by Contact Sex

**eFigure 11.** Funnel Plots of Studies Reporting Household Secondary Attack Rates of SARS-CoV-2 for Female and Male Contacts

**eFigure 12.** Secondary Attack Rates of SARS-CoV-2 to Household Contacts From Adult ( $\geq 18$  Years) and Child ( $< 18$  Years) Index Cases

**eFigure 13.** Secondary Attack Rates of SARS-CoV-2 for Household Contacts by Index Case Sex

**eFigure 14.** Household Secondary Attack Rates of SARS-CoV and MERS-CoV

**eTable 1.** Electronic Databases and Search Strategy for Household Secondary Attack Rate of SARS-CoV-2, MERS-CoV, SARS-CoV, and Other Coronaviruses

**eTable 2.** Risk of Bias Assessment for Studies Included in Review of Household Transmissibility of SARS-CoV-2

**eTable 3.** Description of Index Cases for Studies Included in Review of Household Transmissibility of SARS-CoV-2

**eTable 4.** Description of Contacts for Studies Included in Review of Household Transmissibility of SARS-CoV-2

**eTable 5.** Overdispersion of the Number of Secondary Infections of SARS-CoV-2 per Household

**eTable 6.** Assessment of Factors Potentially Affecting Susceptibility and Infectivity of SARS-CoV-2 in Household Transmission Studies

**eTable 7.** Household Secondary Attack Rate Comparison With Other Viruses

**eTable 8.** Weights for Combined Estimate of Secondary Attack Rates of Severe Acute Respiratory Syndrome Coronavirus 2 (SARS-CoV-2) for Household Contacts and Family Contacts

**eAppendix 1.** Eligibility Criteria

**eAppendix 2.** Data Extraction

**eAppendix 3.** Additional Description of Studies

**eAppendix 4.** Additional Description of Risk Factors

**eReferences.**

This supplemental material has been provided by the authors to give readers additional information about their work.

**eFigure 1. PRISMA Flow Diagram for Review of Household Secondary Attack of SARS-CoV-2, MERS-CoV, SARS-CoV, and Other Coronaviruses**

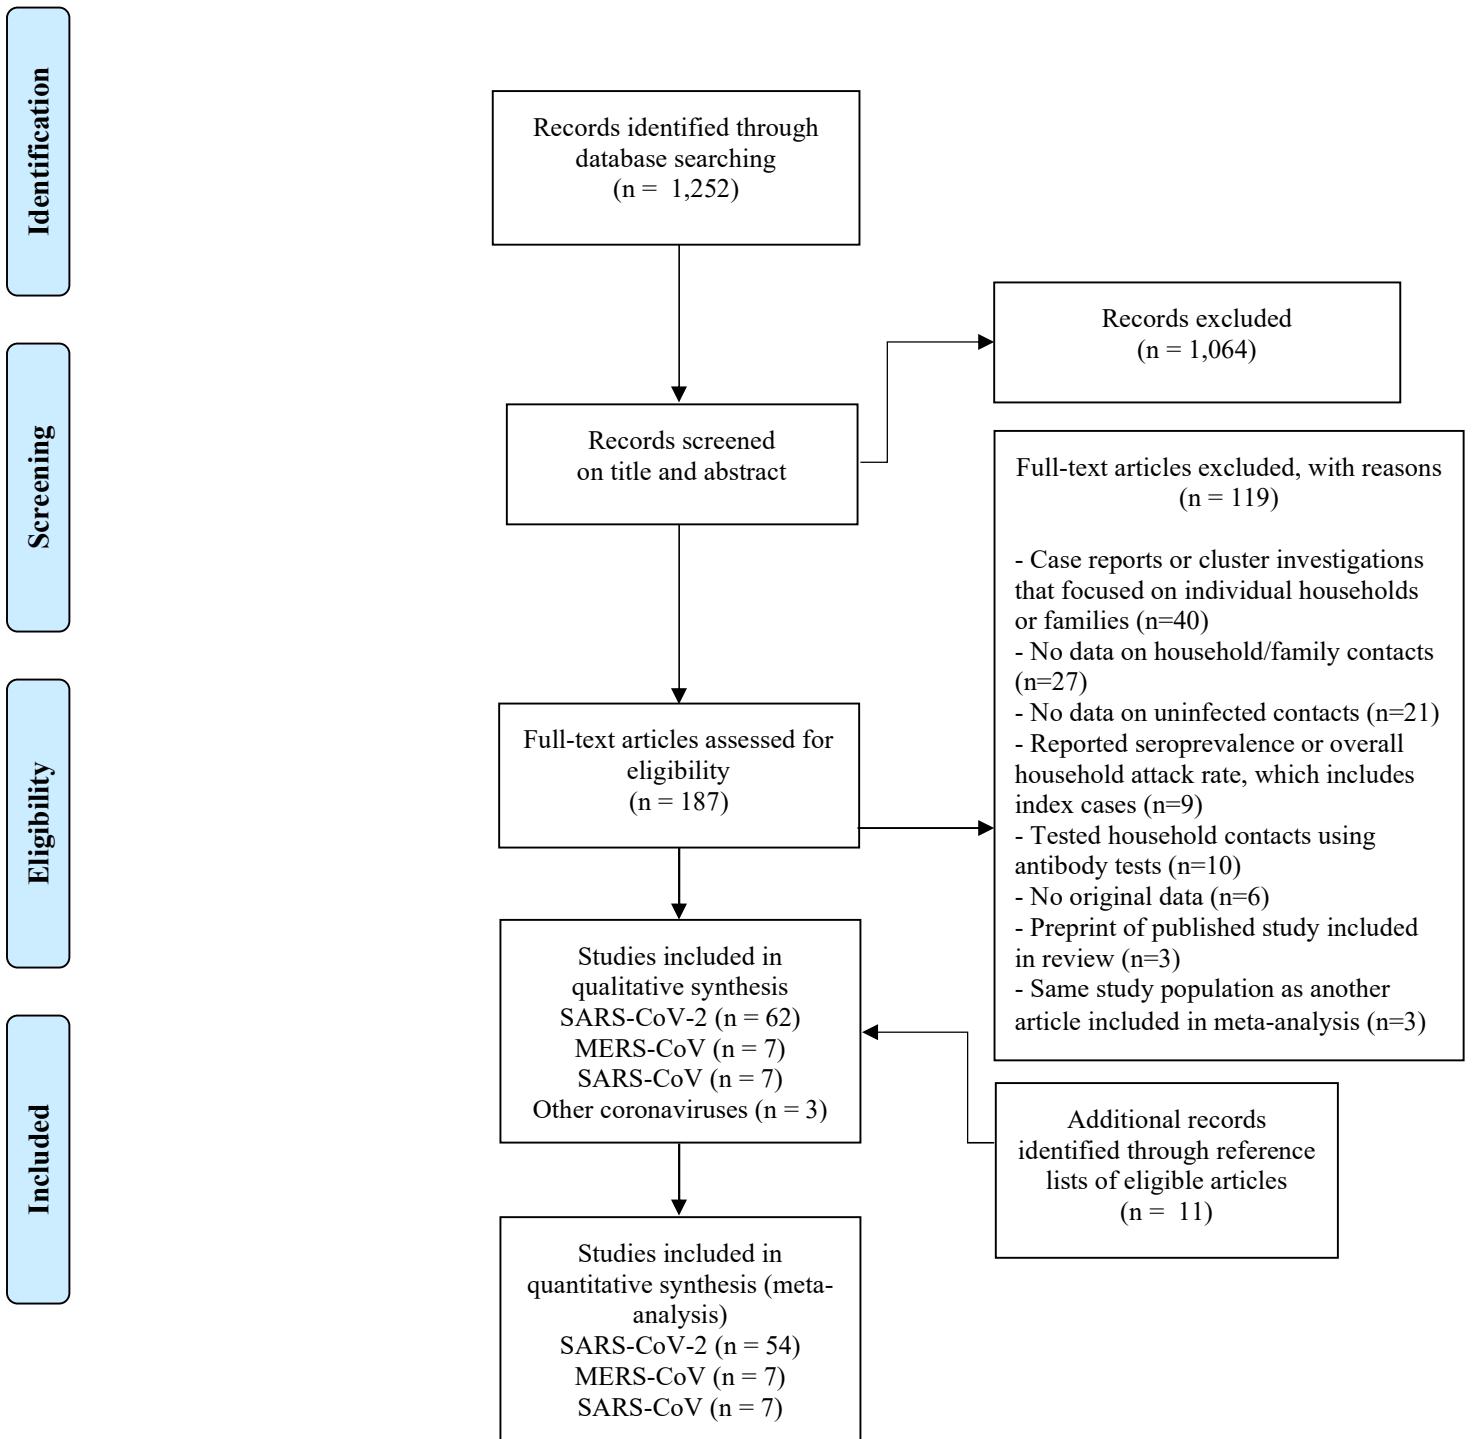

**eFigure 2. Secondary Attack Rates of SARS-CoV-2 for Studies of Close Contacts**

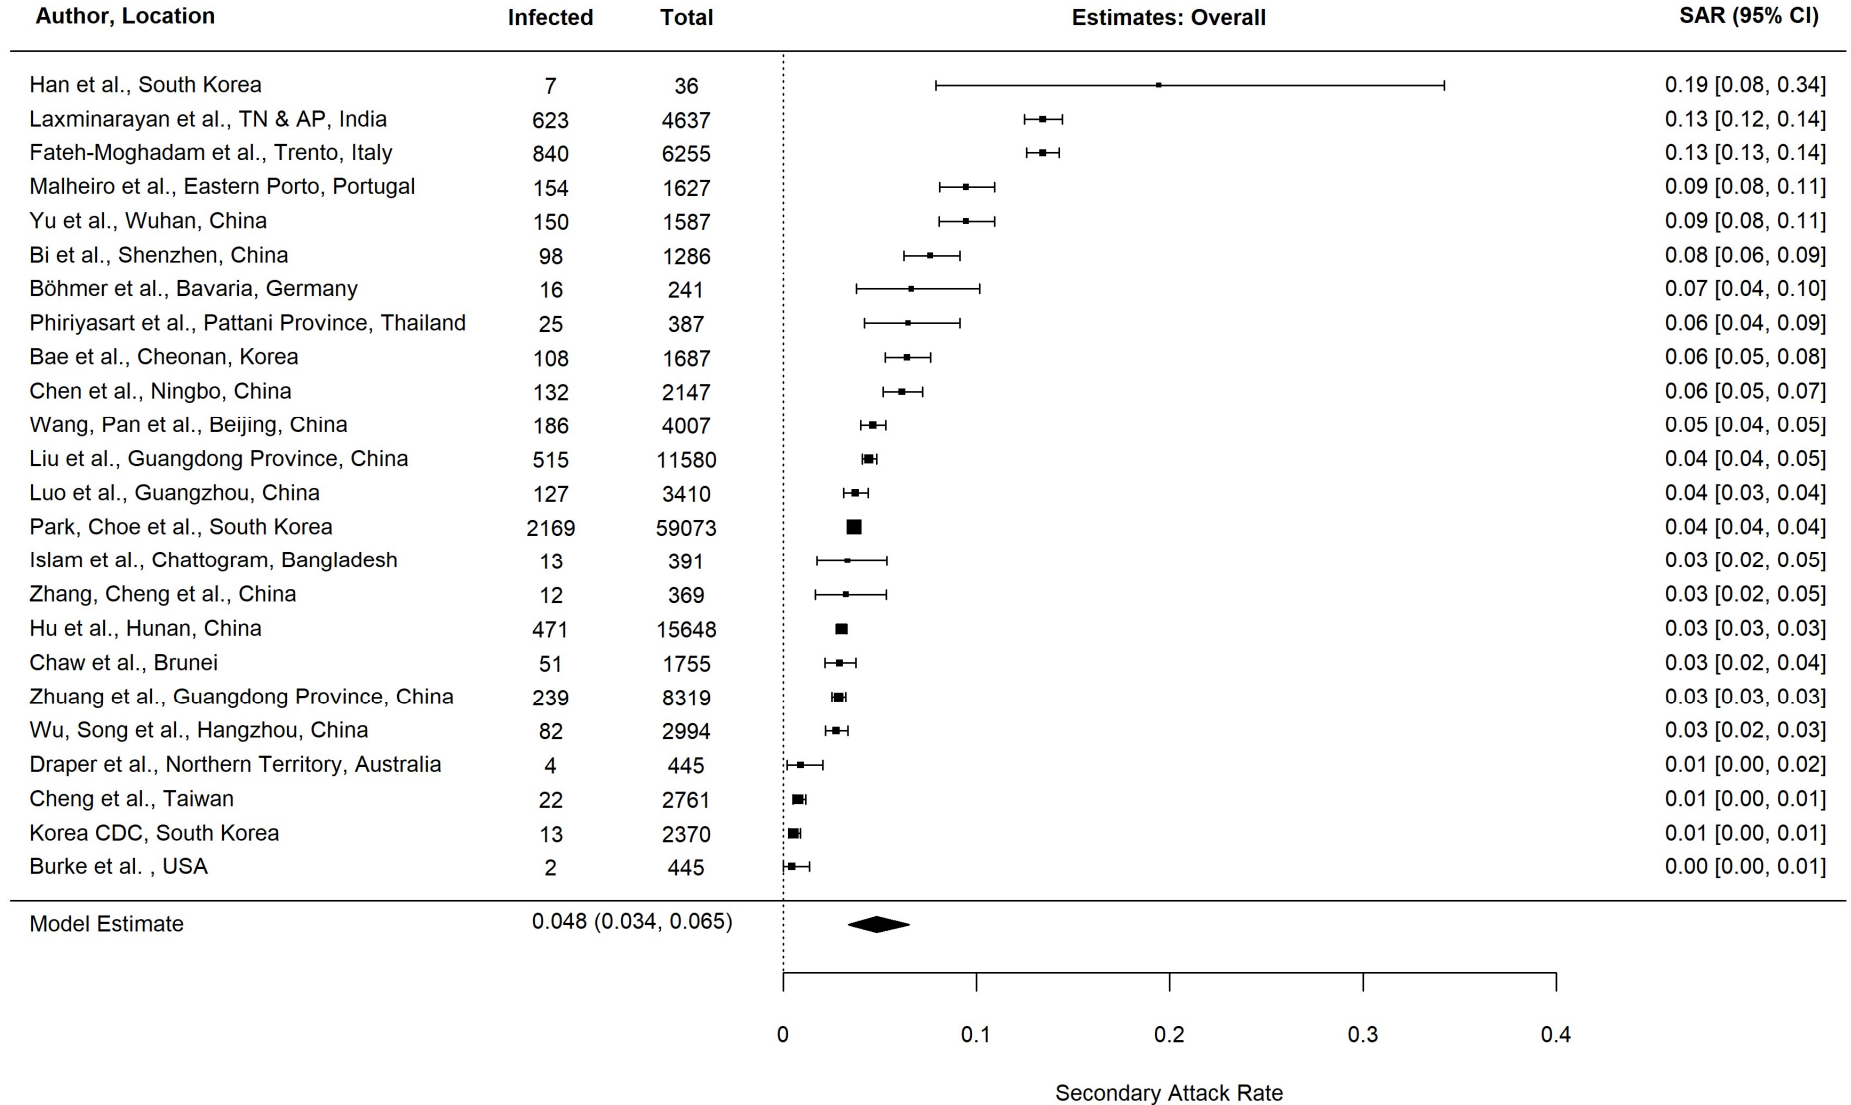

Point sizes are an inverse function of the precision of the estimates and bars correspond to 95% confidence intervals.

**eFigure 3. Funnel Plots of Studies Reporting Secondary Attack Rates of SARS-CoV-2 for Household, Family, and Close Contacts**

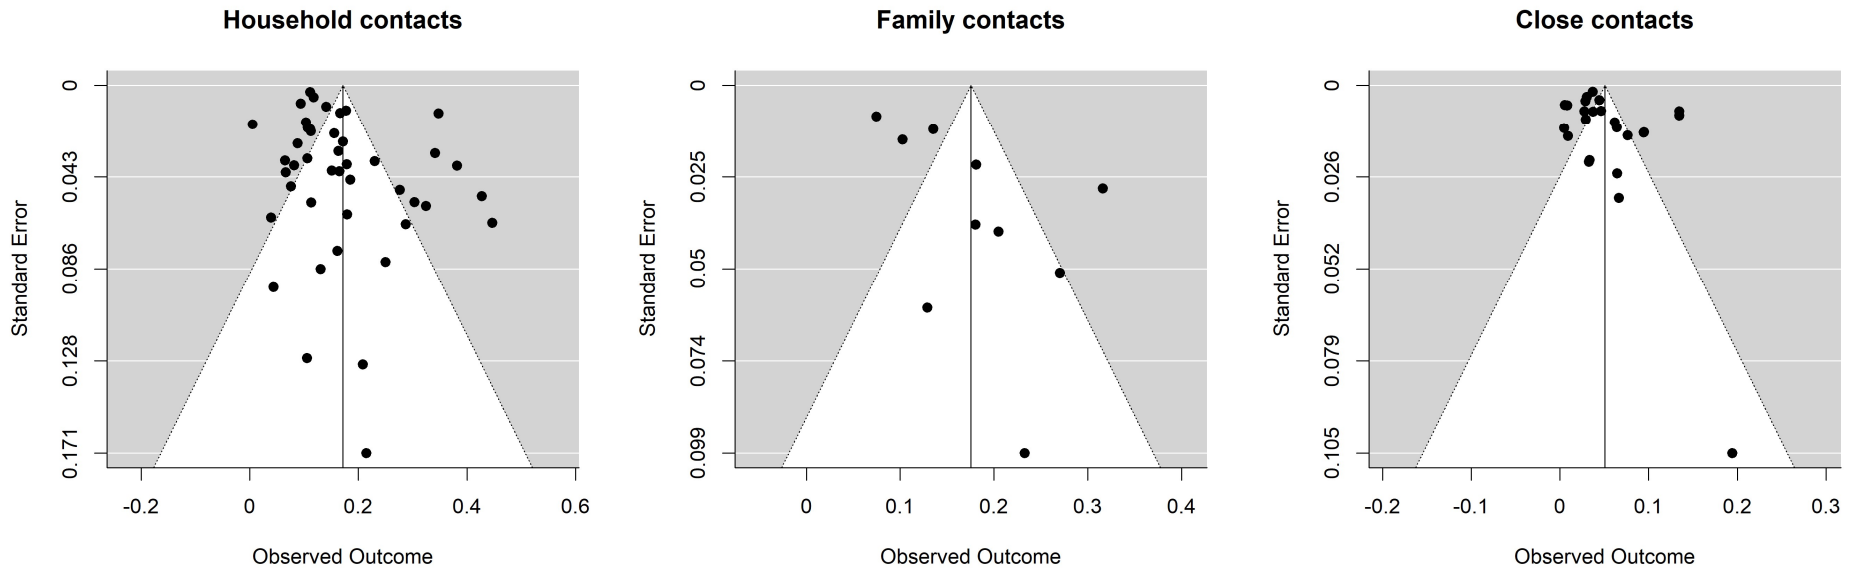

Publication bias assessment: household (Begg:  $P=0.23$ ; Egger:  $P=0.20$ ), family (Begg:  $P=0.48$ ; Egger:  $P=0.14$ ), and close (Begg:  $P=0.16$ ; Egger:  $P=0.17$ ) contacts

# eFigure 4. Household Secondary Attack Rates of SARS-CoV-2, Restricted to Studies With Low or Moderate Risk of Bias as Determined by the Modified Newcastle-Ottawa Scale

See eTable 2 for details

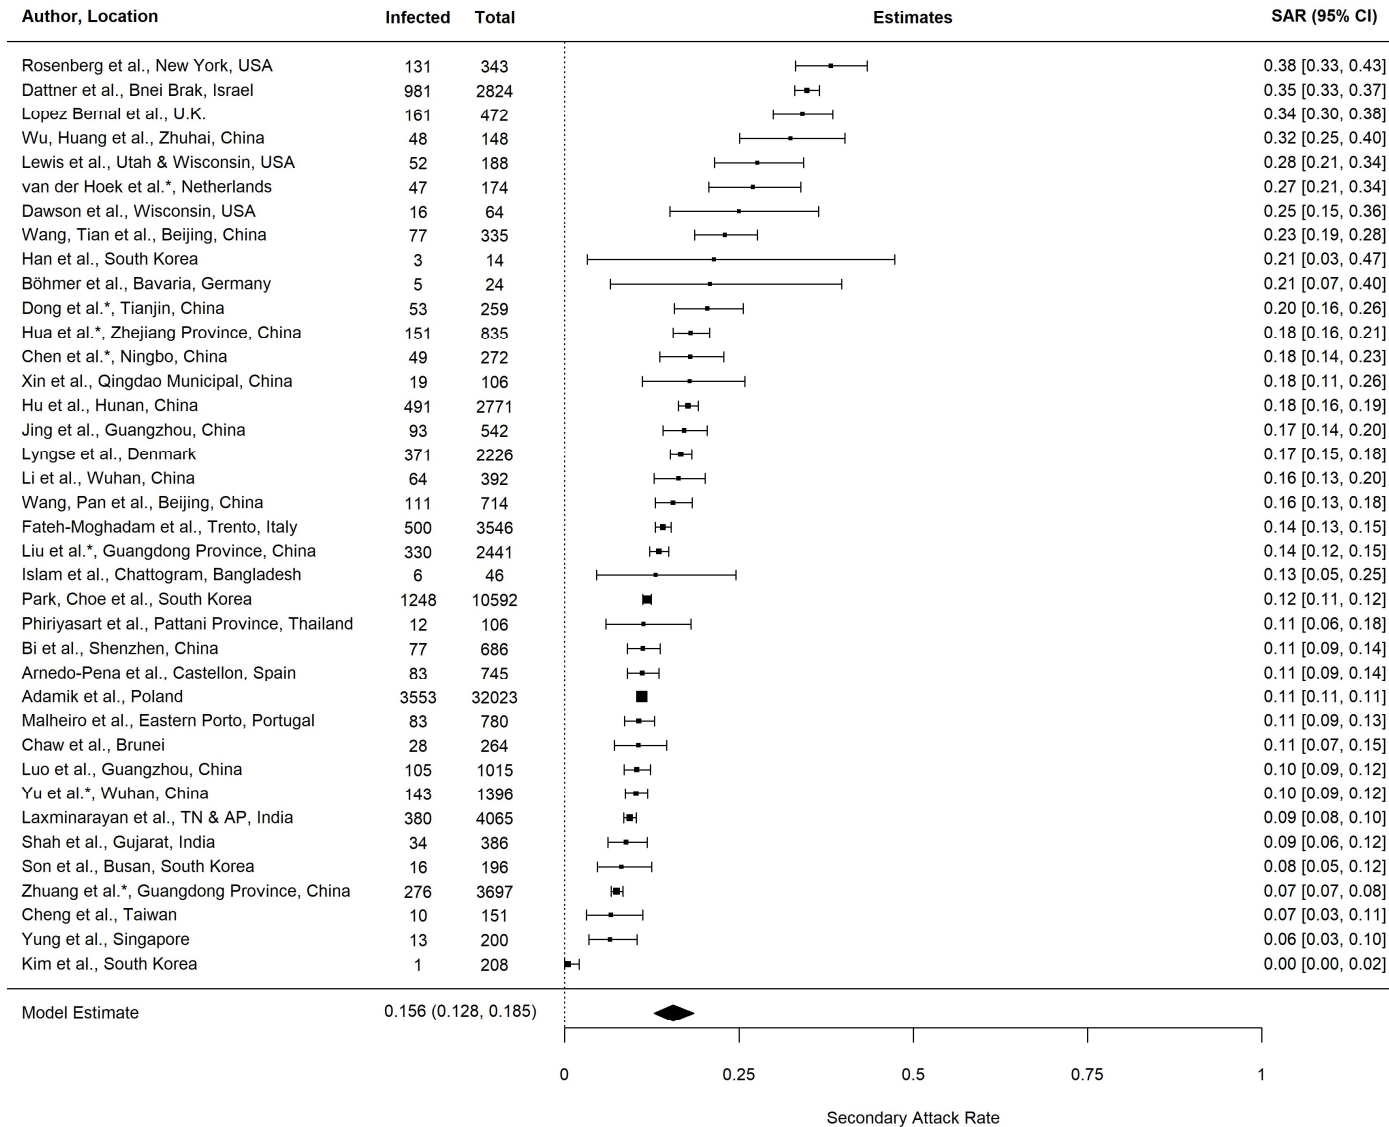

Point sizes are an inverse function of the precision of the estimates and bars correspond to 95% confidence intervals. Studies of family contacts are indicated by the asterisk (\*).

**eFigure 5. Household Secondary Attack Rates of SARS-CoV-2, Grouped by Studies in China vs Other Locations**

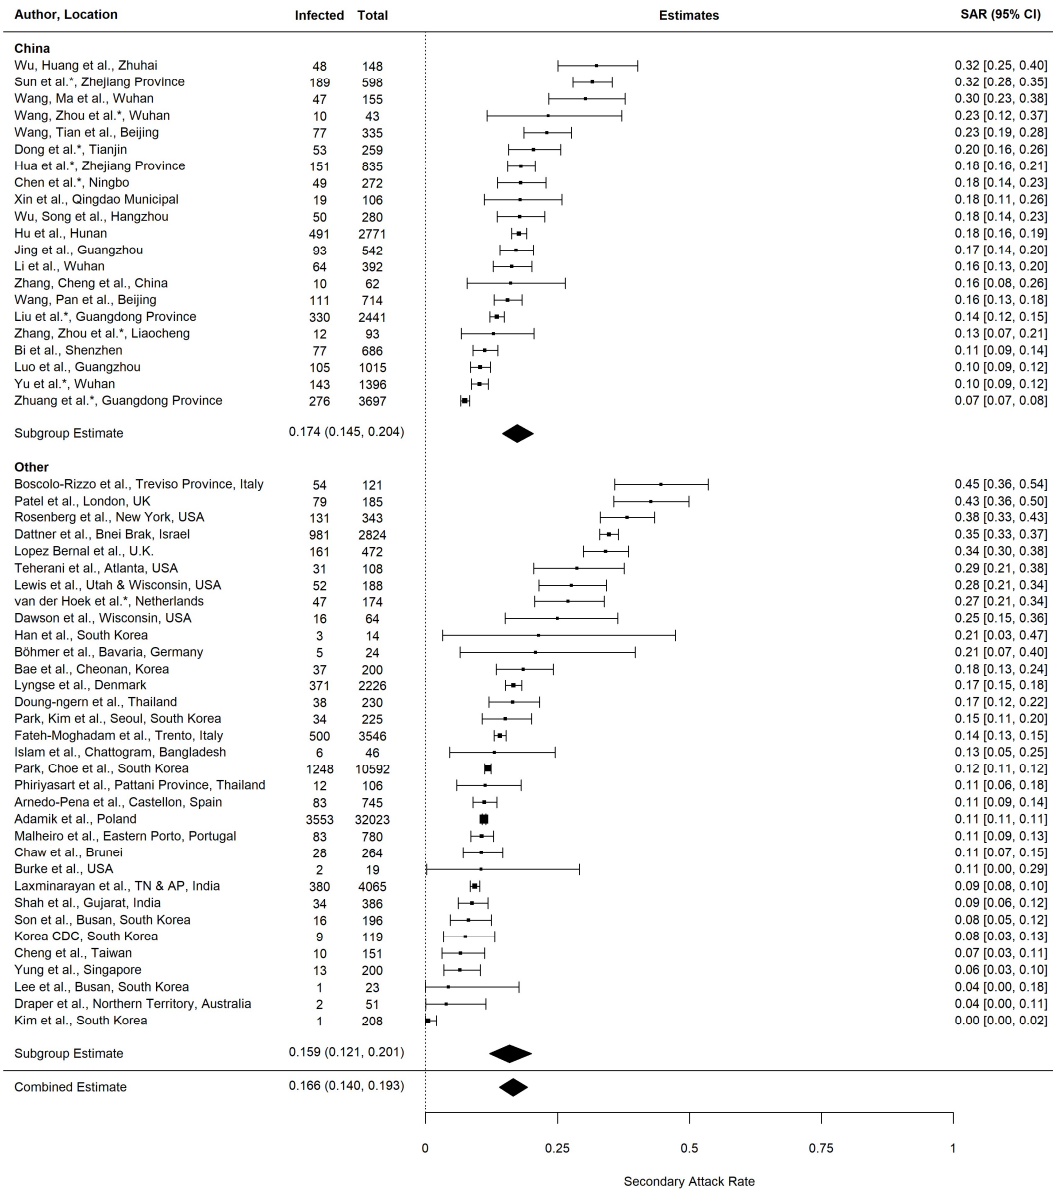

Point sizes are an inverse function of the precision of the estimates and bars correspond to 95% confidence intervals. Studies of family contacts are indicated by the asterisk (\*).

## eFigure 6. Secondary Attack Rates of SARS-CoV-2, Grouped by Studies That Tested Only Symptomatic Household Contacts and Studies That Tested All Household Contacts Irrespective of Symptoms

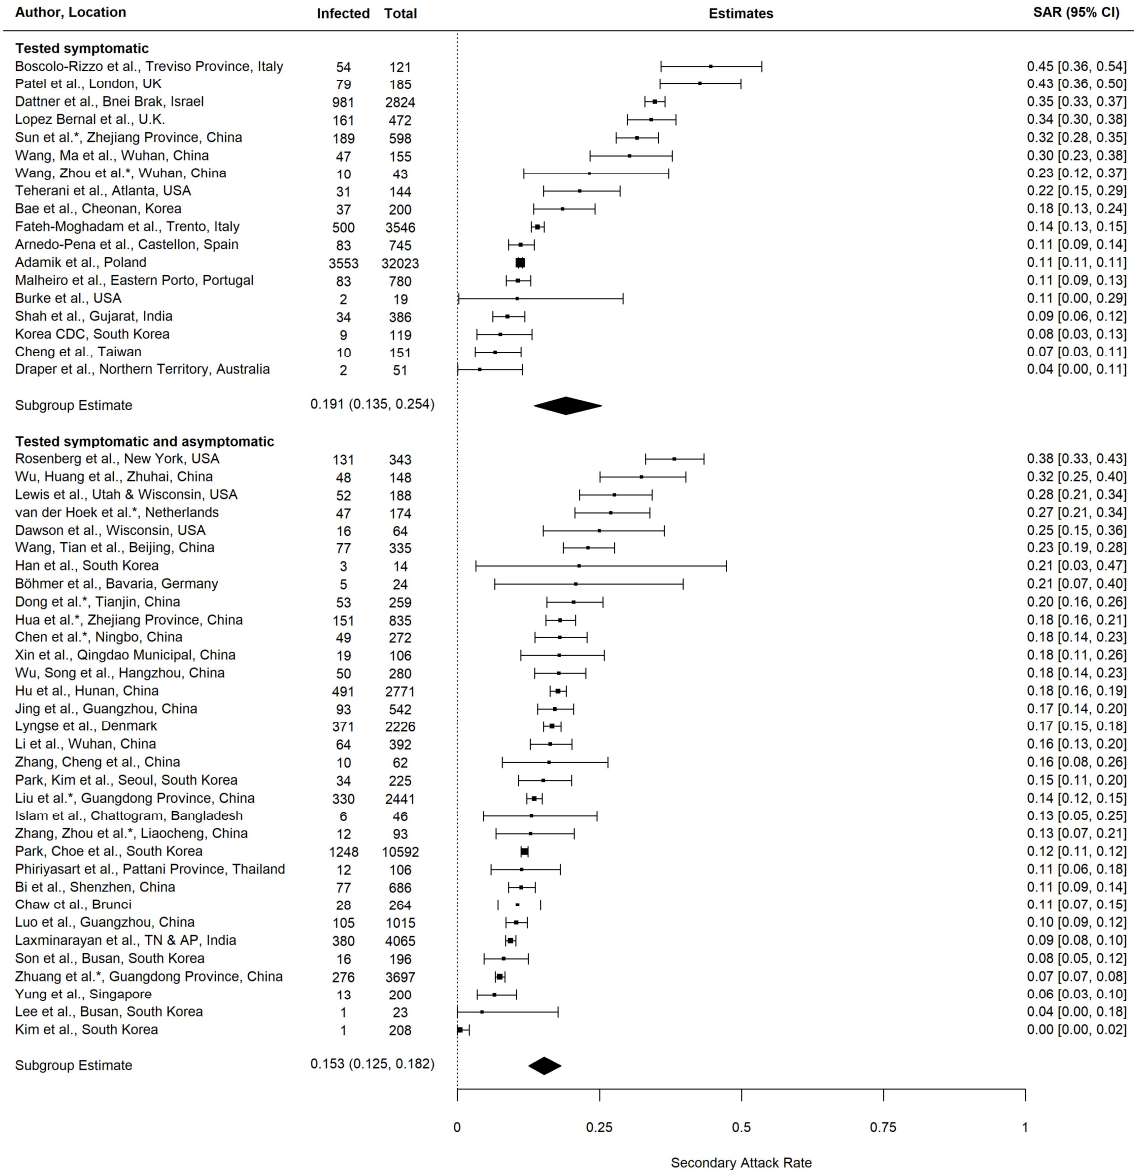

Three studies were excluded from this analysis: two for which we could not determine whether they tested only symptomatic or all contacts, and one that tested only asymptomatic contacts. Point sizes are an inverse function of the precision of the estimates and bars correspond to 95% confidence intervals. Studies of family contacts are indicated by the asterisk (\*).



## eFigure 7. Household Secondary Attack Rates of SARS-CoV-2, Grouped by Studies Early (January-February) and Later (March-July) in the Pandemic

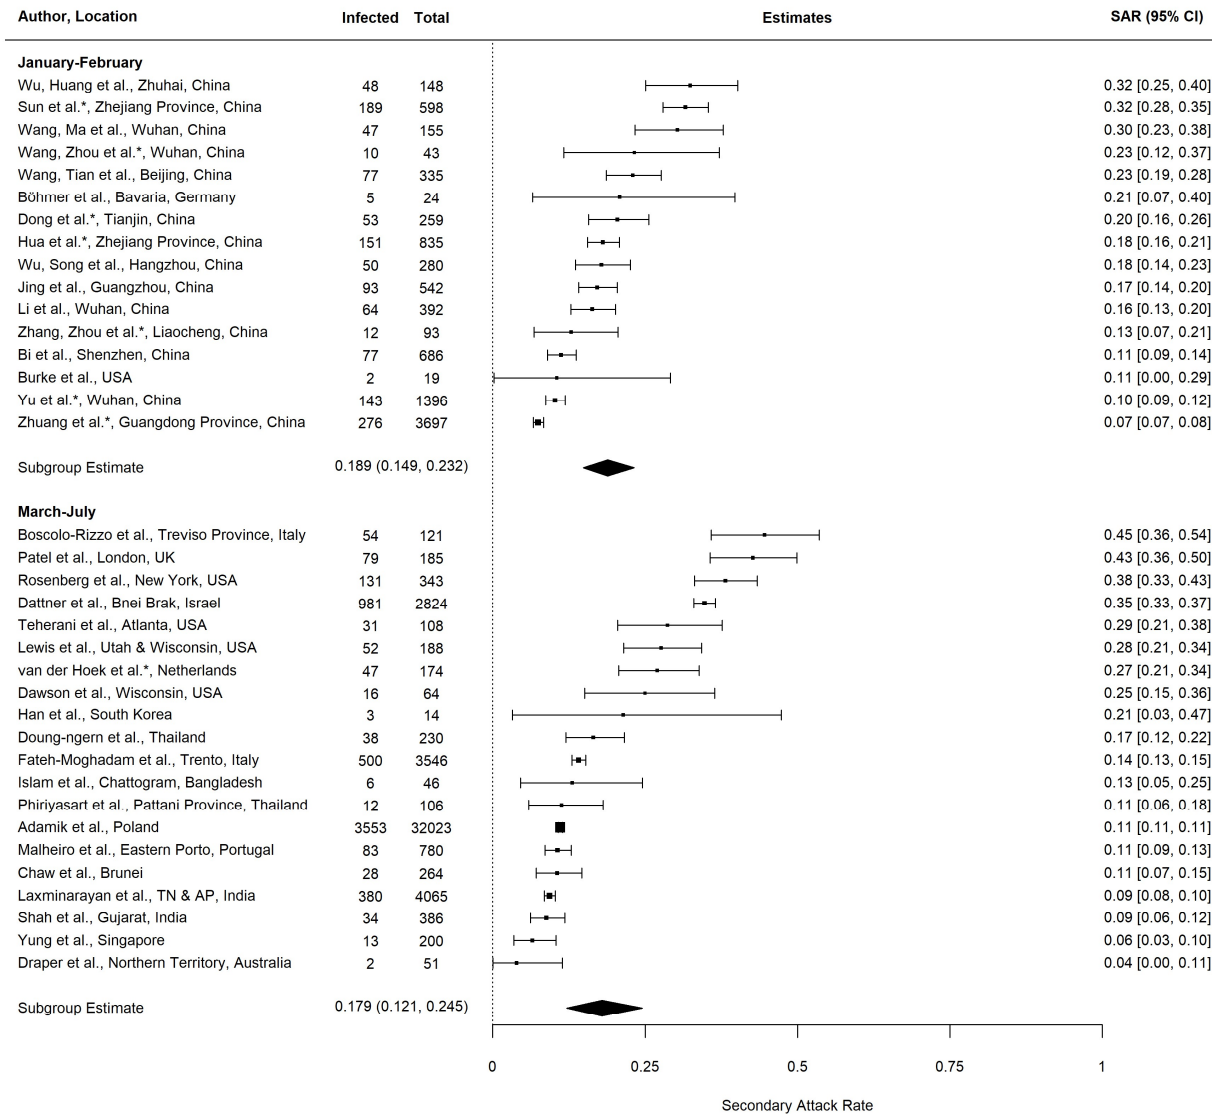

This analysis excluded studies with overlapping dates (e.g., studies that began in February and ended in April). Point sizes are an inverse function of the precision of the estimates and bars correspond to 95% confidence intervals. Studies of family contacts are indicated by the asterisk (\*).

## eFigure 8. Secondary Attack Rates of SARS-CoV-2 From Symptomatic and Asymptomatic or Presymptomatic Index Cases to Household and Family Contacts

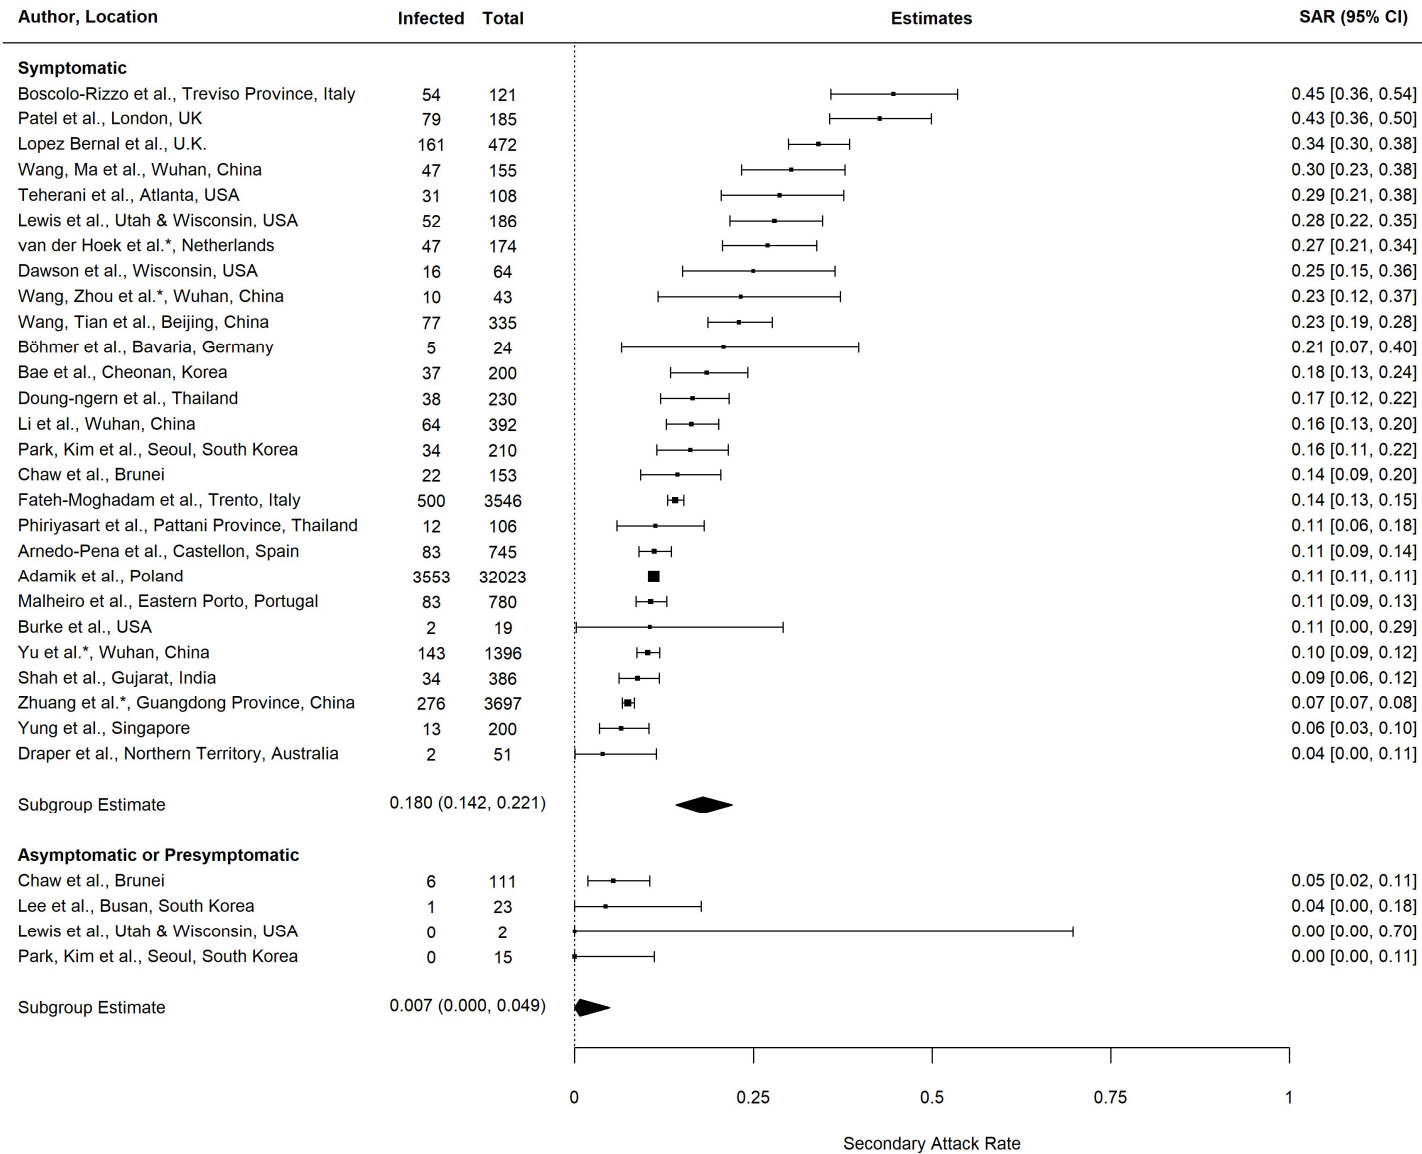

Studies of family contacts are indicated by the asterisk (\*). Point sizes are an inverse function of the precision of the estimates and bars correspond to 95% confidence intervals.

**eFigure 9. Funnel Plots of Studies Reporting Household Secondary Attack Rates of SARS-CoV-2 for Adult ( $\geq 18$  Years) and Child ( $< 18$  Years) Contacts**

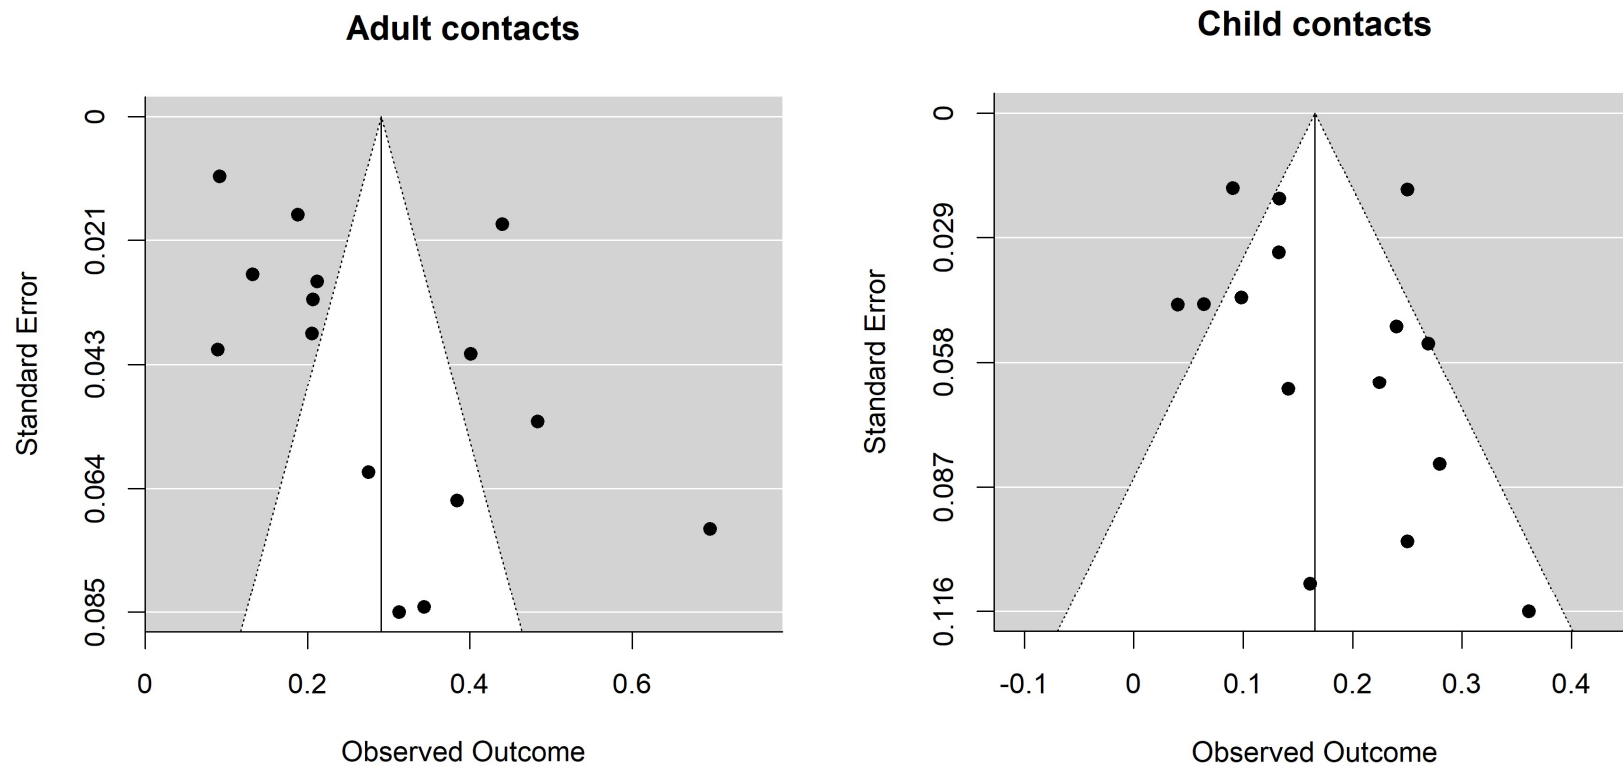

Publication bias assessment: Adult (Begg:  $P=0.03$ ; Egger:  $P=0.03$ ) and child (Begg:  $P=0.20$ ; Egger:  $P=0.12$ ) contacts

**eFigure 10. Secondary Attack Rates of SARS-CoV-2 for Household and Family Contacts by Contact Sex**

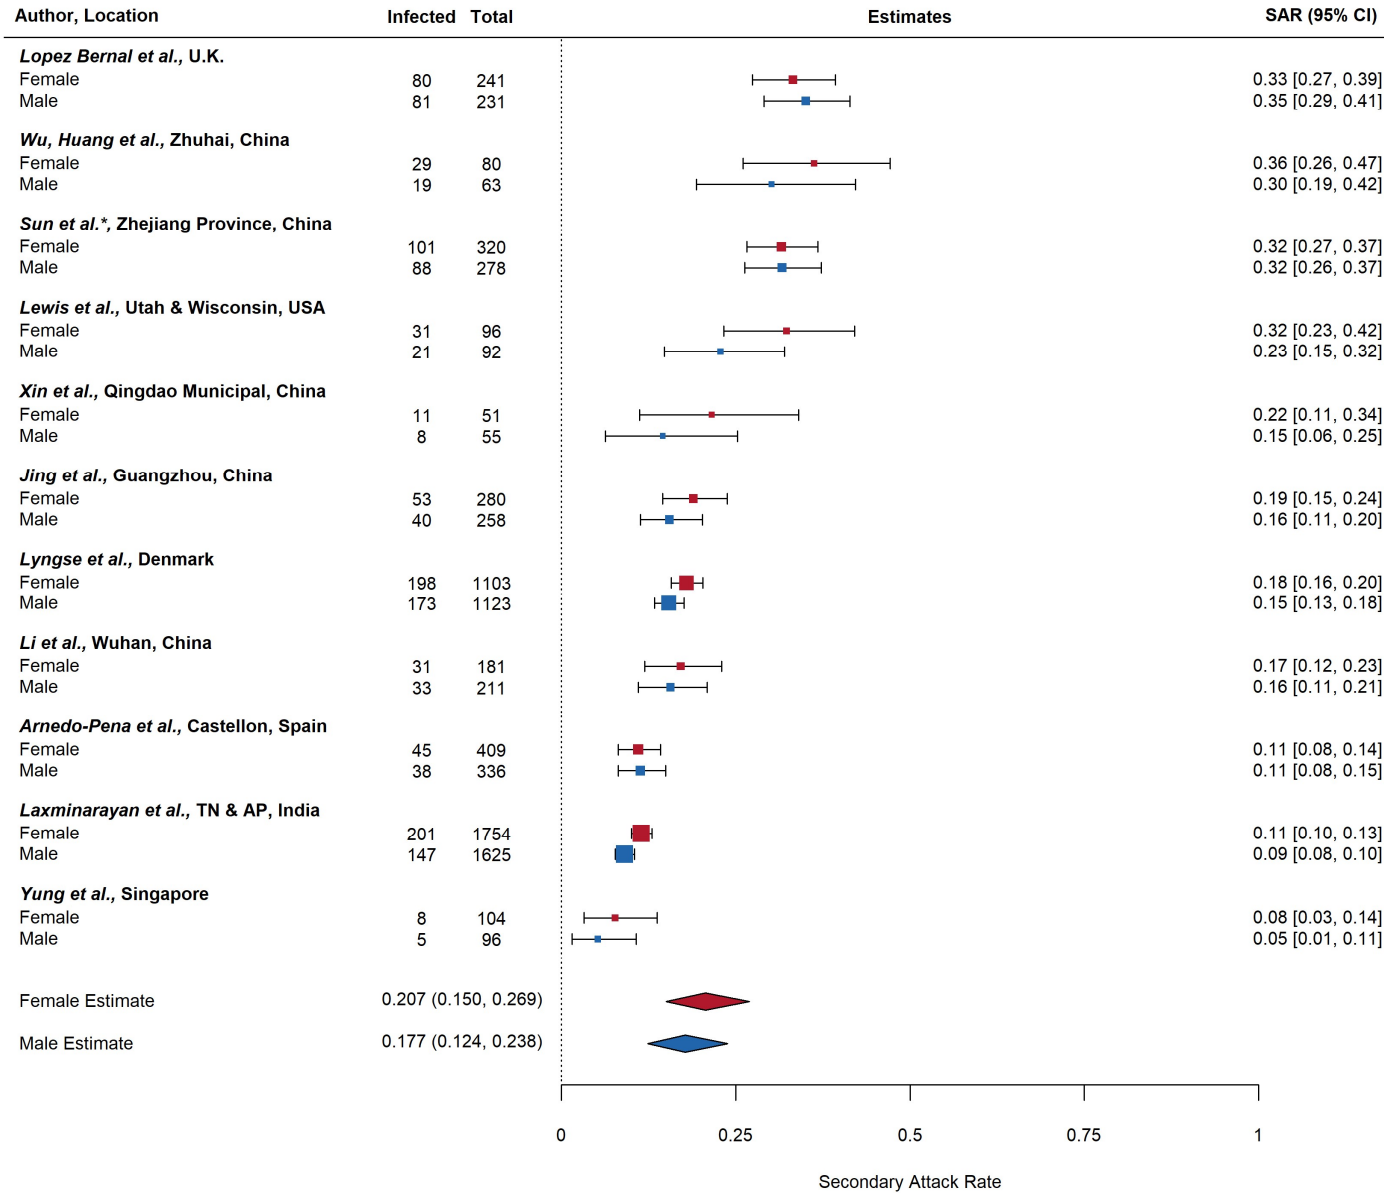

Point sizes are an inverse function of the precision of the estimates and bars correspond to 95% confidence intervals. Studies of family contacts are indicated by the asterisk (\*). Red: female; blue: male.

eFigure 11. Funnel Plots of Studies Reporting Household Secondary Attack Rates of SARS-CoV-2 for Female and Male Contacts

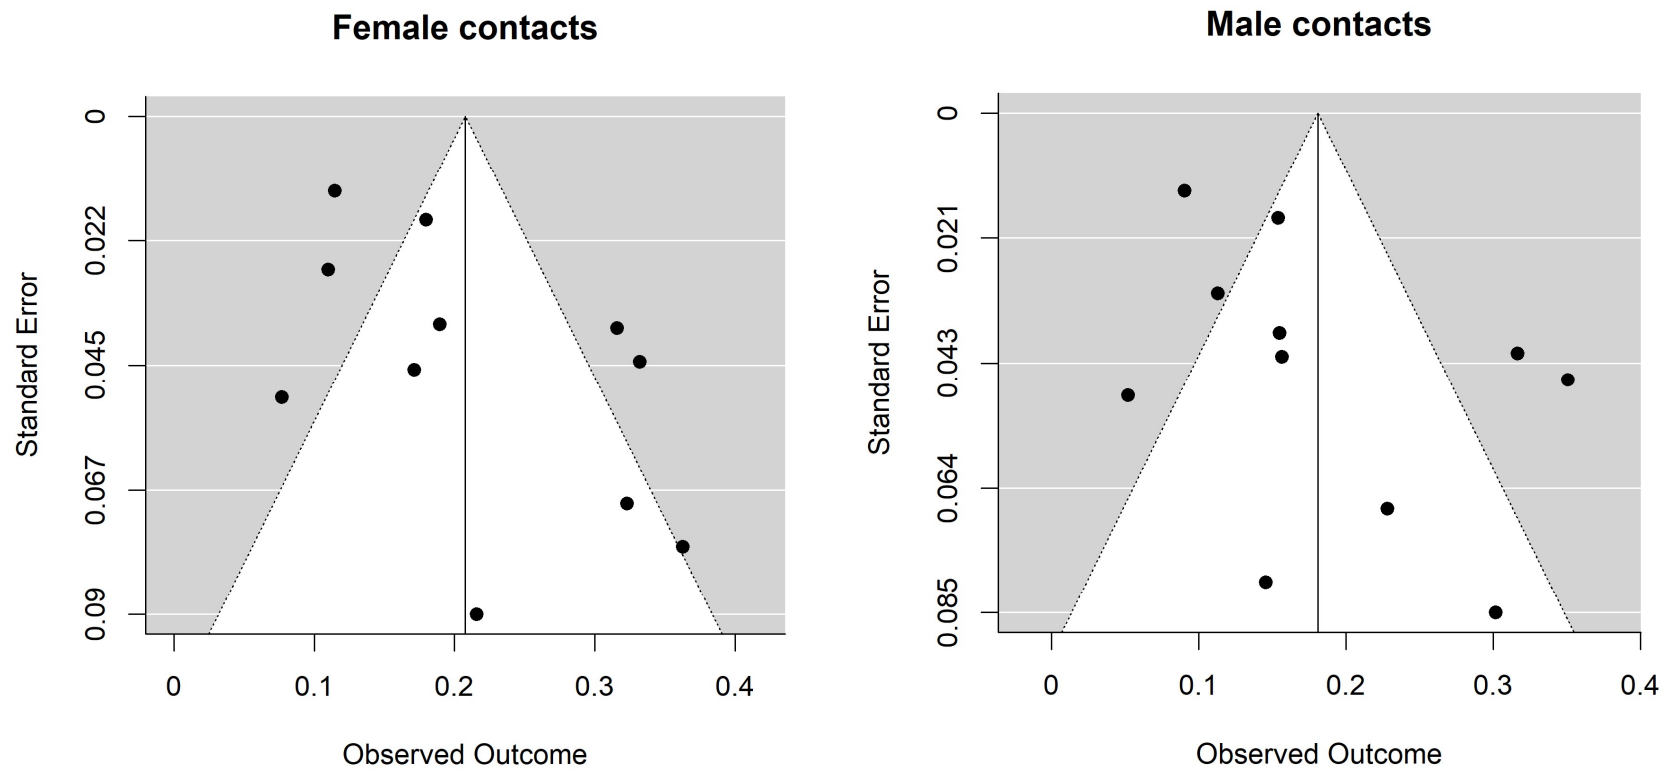

Publication bias assessment: female (Begg:  $P=0.45$ ; Egger:  $P=0.07$ ) and male contacts (Begg:  $P=0.36$ ; Egger:  $P=0.20$ )

**eFigure 12. Secondary Attack Rates of SARS-CoV-2 to Household Contacts From Adult (≥18 Years) and Child (<18 Years) Index Cases**

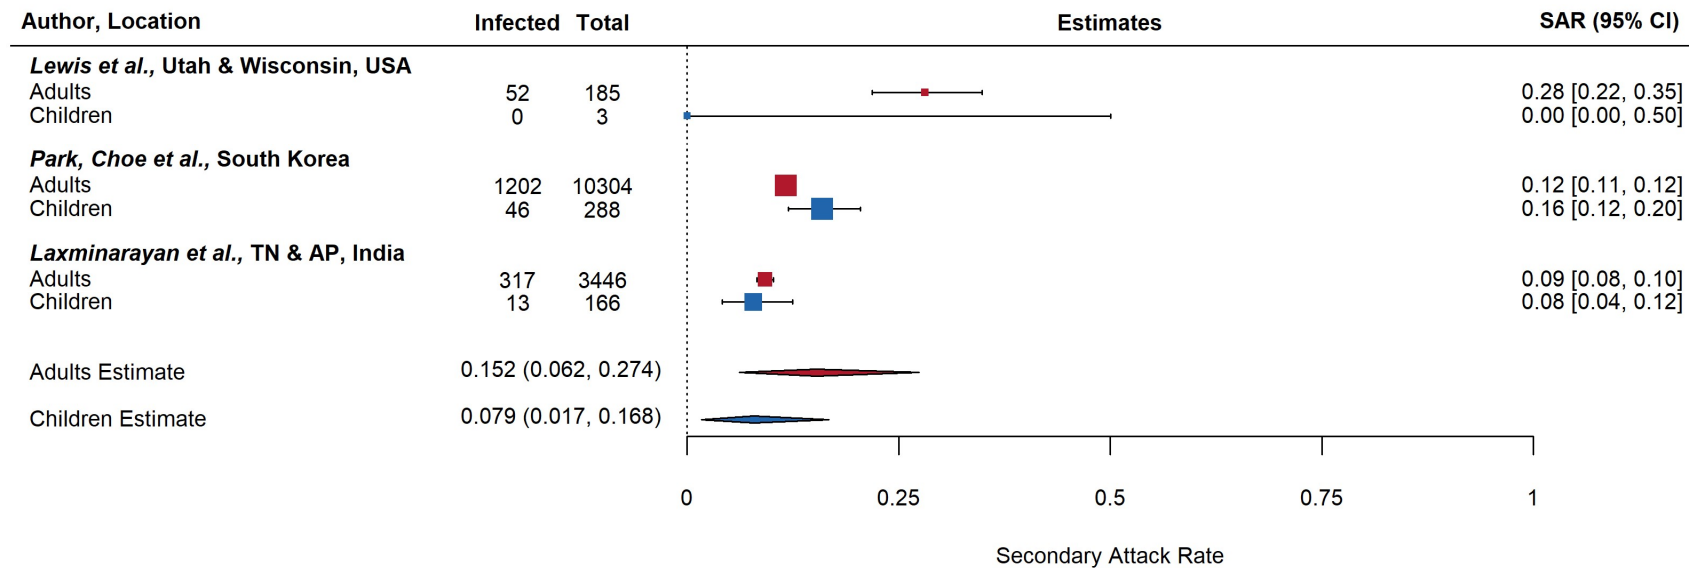

Point sizes are an inverse function of the precision of the estimates and bars correspond to 95% confidence intervals. Red: adults; blue: children.

**eFigure 13. Secondary Attack Rates of SARS-CoV-2 for Household Contacts by Index Case Sex**

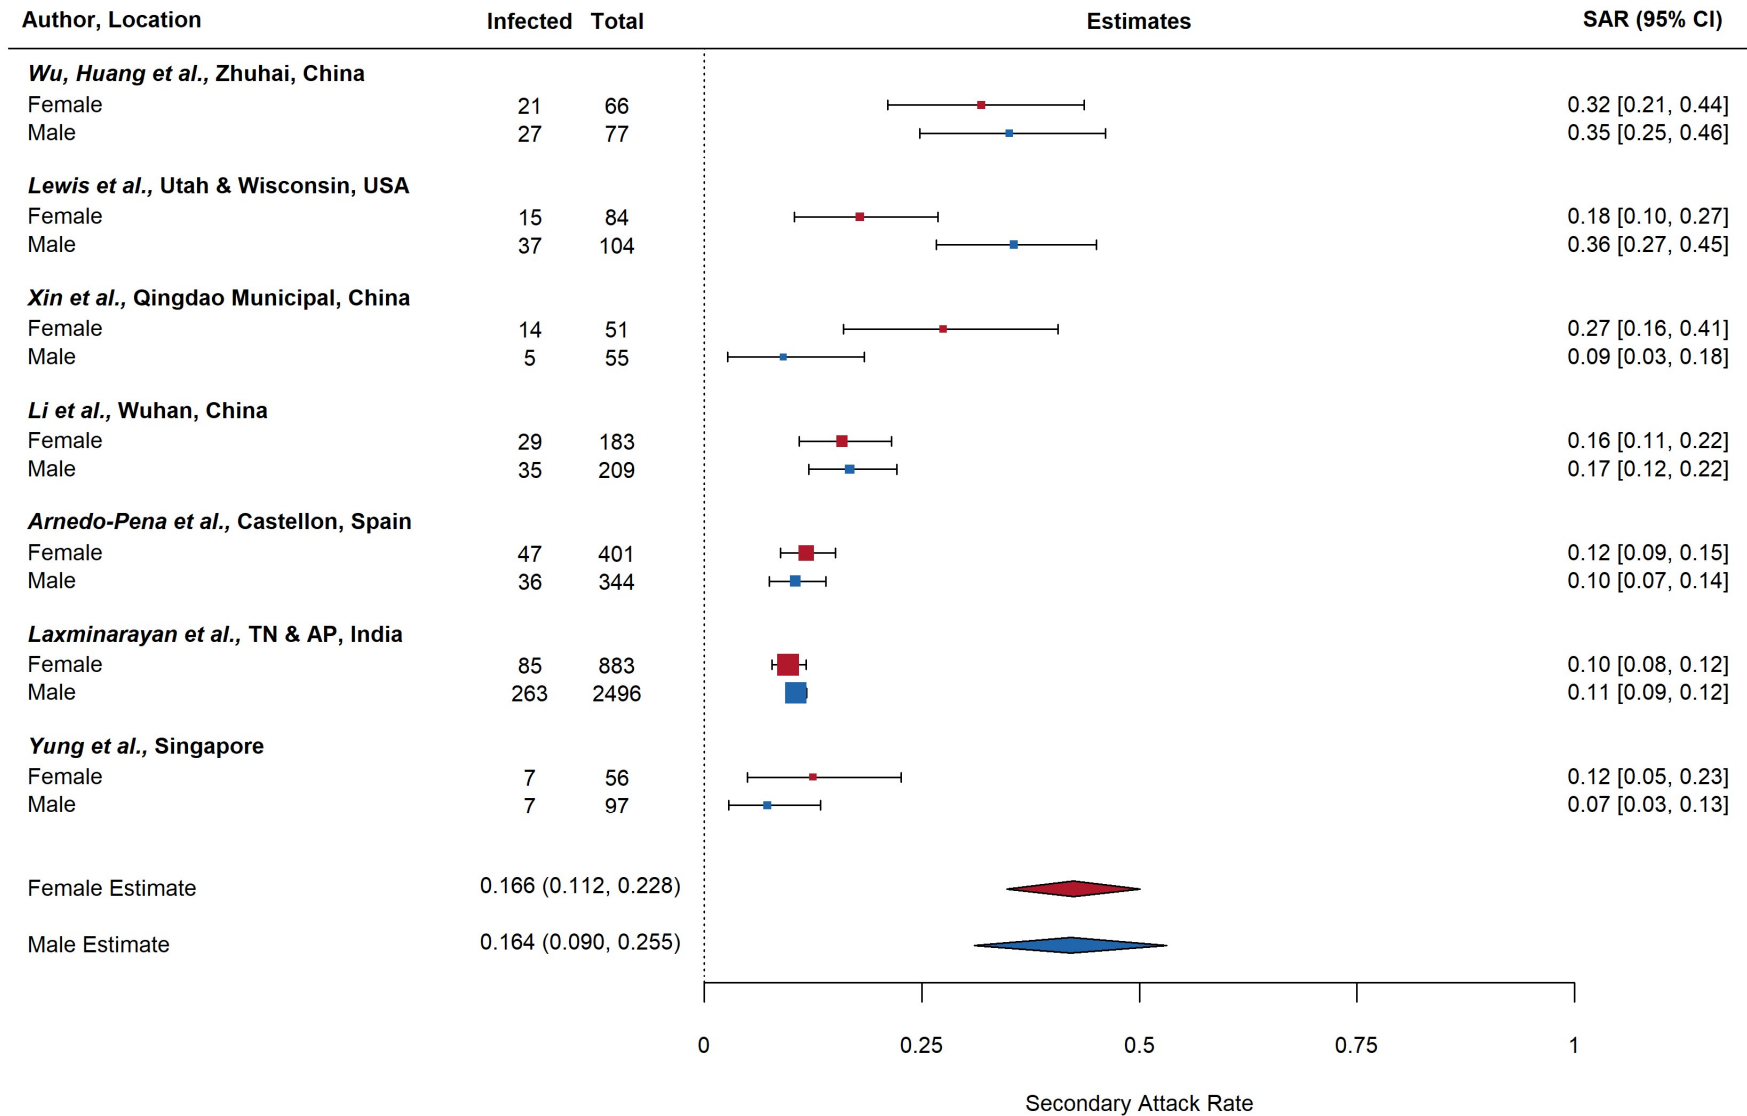

Point sizes are an inverse function of the precision of the estimates and bars correspond to 95% confidence intervals. Red: female; blue: male.

**eFigure 14. Household Secondary Attack Rates of SARS-CoV and MERS-CoV**

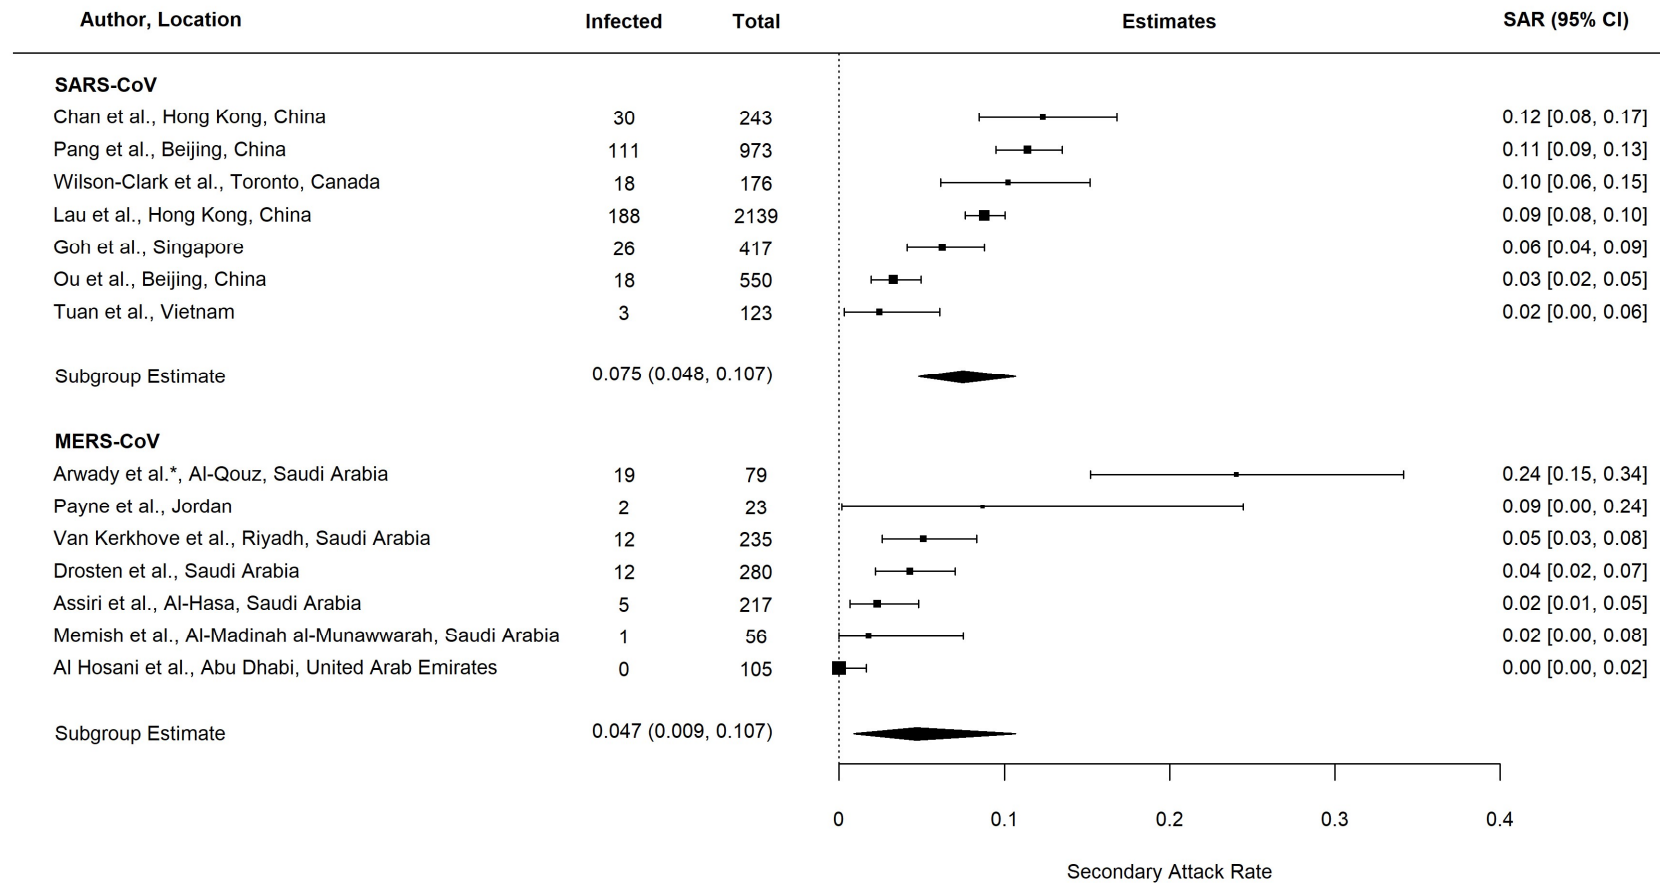

Point sizes are an inverse function of the precision of the estimates and bars correspond to 95% confidence intervals. Studies of family contacts are indicated by the asterisk (\*).



**eTable 1. Electronic Databases and Search Strategy for Household Secondary Attack Rate of SARS-CoV-2, MERS-CoV, SARS-CoV, and Other Coronaviruses**

| <b>Database: PubMed: 1,252 retrieved articles</b>                                                                                                                                                                                                                                                                                                                                                                                                                                                                                                                                                          |                                                                                                                                                                                                                        |
|------------------------------------------------------------------------------------------------------------------------------------------------------------------------------------------------------------------------------------------------------------------------------------------------------------------------------------------------------------------------------------------------------------------------------------------------------------------------------------------------------------------------------------------------------------------------------------------------------------|------------------------------------------------------------------------------------------------------------------------------------------------------------------------------------------------------------------------|
| #1: "SARS-CoV-2" [All Fields] OR COVID-19 [All Fields] OR "MERS" [All Fields] OR "MERS-CoV" [All Fields] OR "Middle East Respiratory Syndrome" [All Fields] OR "SARS-CoV" [All Fields] OR "SARS" [All Fields] OR "severe acute respiratory syndrome" [All Fields] OR "coronavirus" [All Fields] OR "HCoV-NL63" [All Fields] OR "HCoV-OC43" [All Fields] OR "HCoV-229E" [All Fields] OR "HCoV-HKU1" [All Fields] OR "HCoV" [All Fields] OR "Human coronavirus NL63" [All Fields] OR "Human coronavirus OC43" [All Fields] OR "Human coronavirus 229E" [All Fields] OR "Human coronavirus HKU1" [All Fields] | #2: "secondary attack rate" [All Fields] OR household [All Fields] OR "close contacts" [All Fields] OR "contact transmission" [All Fields] OR "contact attack rate" [All Fields] OR "family transmission" [All Fields] |
| <b>#1 AND #2</b>                                                                                                                                                                                                                                                                                                                                                                                                                                                                                                                                                                                           |                                                                                                                                                                                                                        |

We searched PubMed using terms described in this table for studies of SARS-CoV-2, SARS-CoV, Middle East Respiratory Syndrome coronavirus (MERS-CoV), and human coronaviruses NL63 (HCoV-NL63), OC43 (HCoV-OC43), 229E (HCoV-229E), and HKU1 (HCoV-HKU1) with no restrictions on language, study design, time, or place of publication. Pre-prints were included. We also manually searched the reference lists of eligible studies from PubMed to identify further eligible studies. For influenza, we used the secondary attack rates reported in one comprehensive review.<sup>1</sup> We managed all citations using Endnote software X8 (Thomson Reuters, Toronto, CA, USA).

**eTable 2. Risk of Bias Assessment for Studies Included in Review of Household Transmissibility of SARS-CoV-2**

| Author                                     | Selection                                                               |                                              |                                    | Comparability                                                                                           | Outcome                                                   |                                            |                                                    | Total points | Risk of bias <sup>h</sup> |
|--------------------------------------------|-------------------------------------------------------------------------|----------------------------------------------|------------------------------------|---------------------------------------------------------------------------------------------------------|-----------------------------------------------------------|--------------------------------------------|----------------------------------------------------|--------------|---------------------------|
|                                            | Representativeness of the index cases in region (2 points) <sup>a</sup> | Index case definition (1 point) <sup>b</sup> | Sample size (1 point) <sup>c</sup> | Household secondary attack rate disaggregated by index and/or contact covariates (1 point) <sup>d</sup> | Universal or symptom-based testing (1 point) <sup>e</sup> | Follow-up duration (2 points) <sup>f</sup> | Number of tests per contact (1 point) <sup>g</sup> |              |                           |
| <i>Adamik et al.</i> <sup>4</sup>          | ++                                                                      | +                                            | +                                  | +                                                                                                       | 0                                                         | 0                                          | 0                                                  | 5            | Moderate                  |
| <i>Arnedo-Pena et al.</i> <sup>5</sup>     | ++                                                                      | 0                                            | +                                  | +                                                                                                       | 0                                                         | 0                                          | 0                                                  | 4            | Moderate                  |
| <i>Bae et al.</i> <sup>6</sup>             | 0                                                                       | +                                            | 0                                  | 0                                                                                                       | 0                                                         | +                                          | 0                                                  | 2            | High                      |
| <i>Bi et al.</i> <sup>7</sup>              | ++                                                                      | +                                            | +                                  | +                                                                                                       | +                                                         | +                                          | 0                                                  | 7            | Low                       |
| <i>Böhmer et al.</i> <sup>8</sup>          | 0                                                                       | +                                            | 0                                  | +                                                                                                       | +                                                         | +                                          | +                                                  | 5            | Moderate                  |
| <i>Boscolo-Rizzo et al.</i> <sup>9</sup>   | +                                                                       | 0                                            | 0                                  | 0                                                                                                       | 0                                                         | +                                          | 0                                                  | 2            | High                      |
| <i>Burke et al.</i> <sup>10</sup>          | 0                                                                       | +                                            | 0                                  | 0                                                                                                       | 0                                                         | +                                          | 0                                                  | 2            | High                      |
| <i>Chaw et al.</i> <sup>11</sup>           | ++                                                                      | +                                            | 0                                  | +                                                                                                       | +                                                         | +                                          | +                                                  | 7            | Low                       |
| <i>Chen et al.</i> <sup>12</sup>           | ++                                                                      | +                                            | 0                                  | +                                                                                                       | +                                                         | ++                                         | +                                                  | 8            | Low                       |
| <i>Cheng et al.</i> <sup>13</sup>          | ++                                                                      | +                                            | 0                                  | 0                                                                                                       | 0                                                         | +                                          | +                                                  | 5            | Moderate                  |
| <i>Dattner et al.</i> <sup>14</sup>        | ++                                                                      | +                                            | +                                  | +                                                                                                       | 0                                                         | 0                                          | 0                                                  | 5            | Moderate                  |
| <i>Dawson et al.</i> <sup>15</sup>         | +                                                                       | +                                            | 0                                  | 0                                                                                                       | +                                                         | 0                                          | +                                                  | 4            | Moderate                  |
| <i>Dong et al.</i> <sup>16</sup>           | ++                                                                      | +                                            | 0                                  | 0                                                                                                       | +                                                         | 0                                          | +                                                  | 5            | Moderate                  |
| <i>Doung-ngern et al.</i> <sup>17</sup>    | 0                                                                       | +                                            | 0                                  | 0                                                                                                       | 0                                                         | ++                                         | 0                                                  | 3            | High                      |
| <i>Draper et al.</i> <sup>18</sup>         | ++                                                                      | 0                                            | 0                                  | 0                                                                                                       | 0                                                         | +                                          | 0                                                  | 3            | High                      |
| <i>Fateh-Moghadam et al.</i> <sup>19</sup> | +                                                                       | +                                            | +                                  | 0                                                                                                       | 0                                                         | +                                          | 0                                                  | 4            | Moderate                  |
| <i>Han et al.</i> <sup>20</sup>            | 0                                                                       | +                                            | 0                                  | 0                                                                                                       | +                                                         | +                                          | +                                                  | 4            | Moderate                  |
| <i>Hu et al.</i> <sup>21</sup>             | ++                                                                      | +                                            | +                                  | 0                                                                                                       | +                                                         | +                                          | 0                                                  | 6            | Moderate                  |
| <i>Hua et al.</i> <sup>22</sup>            | ++                                                                      | +                                            | +                                  | +                                                                                                       | +                                                         | 0                                          | 0                                                  | 6            | Moderate                  |
| <i>Islam et al.</i> <sup>23</sup>          | +                                                                       | +                                            | 0                                  | 0                                                                                                       | +                                                         | +                                          | 0                                                  | 4            | Moderate                  |
| <i>Jing et al.</i> <sup>24</sup>           | ++                                                                      | +                                            | +                                  | +                                                                                                       | +                                                         | +                                          | +                                                  | 8            | Low                       |
| <i>Kim et al.</i> <sup>25</sup>            | ++                                                                      | +                                            | 0                                  | 0                                                                                                       | +                                                         | +                                          | 0                                                  | 5            | Moderate                  |
| <i>Korea CDC</i> <sup>26</sup>             | ++                                                                      | 0                                            | 0                                  | 0                                                                                                       | 0                                                         | +                                          | 0                                                  | 3            | High                      |
| <i>Laxminarayan et al.</i> <sup>27</sup>   | +                                                                       | +                                            | +                                  | +                                                                                                       | +                                                         | +                                          | 0                                                  | 6            | Moderate                  |
| <i>Lee et al.</i> <sup>28</sup>            | 0                                                                       | +                                            | 0                                  | 0                                                                                                       | +                                                         | 0                                          | 0                                                  | 2            | High                      |
| <i>Lewis et al.</i> <sup>29</sup>          | +                                                                       | +                                            | 0                                  | +                                                                                                       | +                                                         | +                                          | +                                                  | 6            | Moderate                  |

|                                          |    |   |   |   |   |    |   |   |          |
|------------------------------------------|----|---|---|---|---|----|---|---|----------|
| <i>Li et al.</i> <sup>30</sup>           | +  | + | + | + | + | +  | + | 7 | Low      |
| <i>Liu et al.</i> <sup>31</sup>          | ++ | + | + | + | + | +  | + | 8 | Low      |
| <i>Lopez Bernal et al.</i> <sup>32</sup> | ++ | + | + | + | 0 | +  | 0 | 6 | Moderate |
| <i>Luo et al.</i> <sup>33</sup>          | ++ | 0 | + | 0 | + | +  | + | 6 | Moderate |
| <i>Lyngse et al.</i> <sup>34</sup>       | ++ | + | + | + | + | +  | 0 | 7 | Low      |
| <i>Malheiro et al.</i> <sup>35</sup>     | ++ | + | + | 0 | 0 | +  | 0 | 5 | Moderate |
| <i>Park, Choe et al.</i> <sup>36</sup>   | ++ | + | + | + | + | +  | + | 8 | Low      |
| <i>Park, Kim et al.</i> <sup>37</sup>    | 0  | 0 | 0 | + | + | +  | 0 | 3 | High     |
| <i>Patel et al.</i> <sup>38</sup>        | 0  | + | 0 | 0 | 0 | 0  | 0 | 1 | High     |
| <i>Phiriyasart et al.</i> <sup>39</sup>  | 0  | + | 0 | 0 | + | +  | + | 4 | Moderate |
| <i>Rosenberg et al.</i> <sup>40</sup>    | ++ | + | + | + | + | 0  | 0 | 7 | Low      |
| <i>Shah et al.</i> <sup>41</sup>         | +  | 0 | + | 0 | 0 | ++ | 0 | 4 | Moderate |
| <i>Son et al.</i> <sup>42</sup>          | ++ | + | 0 | 0 | + | 0  | 0 | 4 | Moderate |
| <i>Sun et al.</i> <sup>43</sup>          | +  | 0 | + | + | 0 | 0  | 0 | 3 | High     |
| <i>Teherani et al.</i> <sup>44</sup>     | +  | + | 0 | + | 0 | 0  | 0 | 3 | High     |
| <i>van der Hoek et al.</i> <sup>45</sup> | +  | 0 | 0 | + | + | ++ | + | 6 | Moderate |
| <i>Wang, Ma et al.</i> <sup>46</sup>     | +  | 0 | 0 | + | 0 | +  | 0 | 3 | High     |
| <i>Wang, Pan et al.</i> <sup>47</sup>    | ++ | 0 | + | 0 | 0 | +  | + | 5 | Moderate |
| <i>Wang, Tian et al.</i> <sup>48</sup>   | +  | + | + | + | + | +  | 0 | 6 | Moderate |
| <i>Wang, Zhou et al.</i> <sup>49</sup>   | 0  | + | 0 | 0 | 0 | 0  | 0 | 1 | High     |
| <i>Wu, Huang et al.</i> <sup>50</sup>    | +  | + | 0 | + | + | ++ | + | 7 | Low      |
| <i>Wu, Song et al.</i> <sup>51</sup>     | +  | 0 | 0 | 0 | + | +  | 0 | 3 | High     |
| <i>Xin et al.</i> <sup>52</sup>          | ++ | + | 0 | + | + | +  | + | 7 | Low      |
| <i>Yu et al.</i> <sup>53</sup>           | ++ | 0 | + | 0 | 0 | +  | 0 | 4 | Moderate |
| <i>Yung et al.</i> <sup>54</sup>         | +  | 0 | 0 | + | + | +  | 0 | 4 | Moderate |
| <i>Zhang, Cheng et al.</i> <sup>55</sup> | 0  | + | 0 | 0 | + | 0  | + | 3 | High     |
| <i>Zhang, Zhou et al.</i> <sup>56</sup>  | 0  | + | 0 | 0 | + | 0  | 0 | 2 | High     |
| <i>Zhuang et al.</i> <sup>57</sup>       | ++ | 0 | + | 0 | + | 0  | 0 | 4 | Moderate |

<sup>a</sup> ++: Representative of COVID-19 cases in region; +: Somewhat representative; 0: Poorly described or not representative of cases in region

<sup>b</sup> +: Index case identified by date of onset of symptoms and/or test dates; 0: First case not clearly defined

<sup>c</sup> +: ≥300 contacts; 0: <300 contacts

<sup>d</sup> +: Secondary attack rate disaggregated by ≥1 covariate; 0: Secondary attack rate not disaggregated by any covariates

<sup>e</sup> +: Tested all contacts (both symptomatic and asymptomatic); 0: Only tested symptomatic contacts

<sup>f</sup> ++: >14 days; +: 14 days; 0: <14 days or not specified

<sup>g</sup> +: ≥2 tests; 0: 1 test or not described

<sup>h</sup> High: ≤3 points; moderate: 4–6 points; low: ≥7 points

**eTable 3. Description of Index Cases for Studies Included in Review of Household Transmissibility of SARS-CoV-2**

|                                          | Location<br>(city, country)               | Index case<br>identification period | Index case<br>identification<br>method<br>(passive,<br>active <sup>a</sup><br>surveillance) | No. index<br>cases | Index case<br>symptom status   | Transmission<br>mitigation<br>strategies after<br>index case<br>diagnosis |
|------------------------------------------|-------------------------------------------|-------------------------------------|---------------------------------------------------------------------------------------------|--------------------|--------------------------------|---------------------------------------------------------------------------|
| <i>Adamik et al.</i> <sup>4</sup>        | Poland                                    | March to July 1, 2020               | Passive                                                                                     | 13,309             | Symptomatic                    | Index cases isolated                                                      |
| <i>Arnedo-Pena et al.</i> <sup>5</sup>   | Castellon,<br>Spain                       | February 26 to<br>April 8, 2020     | Passive                                                                                     | 347                | Symptomatic                    | –                                                                         |
| <i>Bae et al.</i> <sup>6</sup>           | Cheonan,<br>Korea                         | February 24 to March<br>13, 2020    | Active                                                                                      | 57                 | Symptomatic                    | Contacts<br>quarantined                                                   |
| <i>Bi et al.</i> <sup>7</sup>            | Shenzhen,<br>China                        | January 14 to February<br>12, 2020  | Active and<br>passive                                                                       | 391                | Symptomatic or<br>asymptomatic | Index cases<br>isolated                                                   |
| <i>Böhmer et al.</i> <sup>8</sup>        | Bavaria,<br>Germany                       | January 27 to February<br>11, 2020  | Passive                                                                                     | –                  | –                              | Contacts<br>quarantined                                                   |
| <i>Boscolo-Rizzo et al.</i> <sup>9</sup> | Treviso<br>province, Italy                | March 19 to March 22,<br>2020       | Passive                                                                                     | 179                | Symptomatic                    | Contacts<br>quarantined                                                   |
| <i>Burke et al.</i> <sup>10</sup>        | USA                                       | January 20 to February<br>26, 2020  | Passive                                                                                     | 10                 | Symptomatic                    | Contacts<br>quarantined                                                   |
| <i>Chaw et al.</i> <sup>11</sup>         | Brunei                                    | March 5 to April 4, 2020            | Active and<br>passive                                                                       | 19                 | Symptomatic or<br>asymptomatic | Index cases<br>isolated and<br>contacts<br>quarantined                    |
| <i>Chen et al.</i> <sup>12</sup>         | Ningbo, China                             | January 21 to March 6,<br>2020      | Active                                                                                      | 157                | Symptomatic or<br>asymptomatic | Index cases<br>isolated                                                   |
| <i>Cheng et al.</i> <sup>13</sup>        | Taiwan                                    | January 15 to March 18,<br>2020     | Active and<br>passive                                                                       | 100                | Symptomatic or<br>asymptomatic | Contacts<br>quarantined                                                   |
| <i>Dattner et al.</i> <sup>14</sup>      | Bnei Brak,<br>Israel                      | May 2, 2020                         | Passive                                                                                     | 637                | Symptomatic or<br>asymptomatic | –                                                                         |
| <i>Dawson et al.</i> <sup>15</sup>       | Milwaukee<br>County,<br>Wisconsin,<br>USA | March to April, 2020                | Passive                                                                                     | 26                 | Symptomatic                    | –                                                                         |
| <i>Dong et al.</i> <sup>16</sup>         | Tianjin,<br>China                         | January 7 to February<br>24, 2020   | Active and<br>passive                                                                       | 135                | Symptomatic or<br>asymptomatic | –                                                                         |

|                                            |                                      |                                |                    |       |                                 |                                                       |
|--------------------------------------------|--------------------------------------|--------------------------------|--------------------|-------|---------------------------------|-------------------------------------------------------|
| <i>Doung-ngern et al.</i> <sup>17</sup>    | Thailand                             | March 1 to 31, 2020            | Active and passive | 18    | Symptomatic                     | Contacts quarantined                                  |
| <i>Draper et al.</i> <sup>18</sup>         | Northern Territory, Australia        | March 1 and April 30, 2020     | Passive            | 28    | Symptomatic                     | Cases isolated                                        |
| <i>Fateh-Moghadam et al.</i> <sup>19</sup> | Trento, Italy                        | March to April, 2020           | Passive            | 1,489 | Symptomatic                     | Contacts quarantined                                  |
| <i>Han et al.</i> <sup>20</sup>            | South Korea                          | March 28, 2020                 | Active             | 10    | Symptomatic or asymptomatic     | Cases isolated                                        |
| <i>Hu et al.</i> <sup>21</sup>             | Hunan, China                         | January 16 to April 02, 2020   | Active and passive | 1,178 | Symptomatic or asymptomatic     | Cases isolated                                        |
| <i>Hua et al.</i> <sup>22</sup>            | Zhejiang Province, China             | January 7 to February 29, 2020 | Passive            | 314   | Symptomatic or asymptomatic     | Cases isolated                                        |
| <i>Islam et al.</i> <sup>23</sup>          | Chattogram, Bangladesh               | April 3 to June 2, 2020        | Active and passive | 181   | Symptomatic or asymptomatic     | Contacts quarantined                                  |
| <i>Jing et al.</i> <sup>24</sup>           | Guangzhou, China                     | January 6 to February 17, 2020 | Active and passive | 349   | Symptomatic or asymptomatic     | Evaluated scenarios with/without quarantine/isolation |
| <i>Kim et al.</i> <sup>25</sup>            | South Korea                          | January 20 to April 6, 2020    | Passive            | 107   | Symptomatic or asymptomatic     | Index cases isolated and contacts quarantined         |
| <i>Korea CDC</i> <sup>26</sup>             | South Korea                          | January 24 to March 10, 2020   | Active             | 30    | Symptomatic or asymptomatic     | Cases isolated                                        |
| <i>Laxminarayan et al.</i> <sup>27</sup>   | Tamil Nadu and Andhra Pradesh, India | March 5 to June 4, 2020        | Active and passive | 998   | Symptomatic or asymptomatic     | –                                                     |
| <i>Lee et al.</i> <sup>28</sup>            | Busan, South Korea                   | February 21 to March 13, 2020  | Active and passive | 10    | Asymptomatic or pre-symptomatic | Cases isolated                                        |
| <i>Lewis et al.</i> <sup>29</sup>          | Wisconsin and Utah, USA              | March 22 to April 25, 2020     | Passive            | 58    | Symptomatic                     | –                                                     |
| <i>Li et al.</i> <sup>30</sup>             | Wuhan, China                         | January 1 to February 20, 2020 | Passive            | 105   | Symptomatic                     | Contacts quarantined                                  |
| <i>Liu et al.</i> <sup>31</sup>            | Guangdong Province, China            | January 10 to March 15, 2020   | Active and passive | 1,158 | Symptomatic                     | Cases isolated                                        |

|                                          |                            |                                   |                    |       |                             |                                               |
|------------------------------------------|----------------------------|-----------------------------------|--------------------|-------|-----------------------------|-----------------------------------------------|
| <i>Lopez Bernal et al.</i> <sup>32</sup> | U.K.                       | January 24 to March 13, 2020      | Passive            | 365   | Symptomatic                 | –                                             |
| <i>Luo et al.</i> <sup>33</sup>          | Guangzhou, China           | January 13 to March 6, 2020       | Active and passive | 69    | Symptomatic or asymptomatic | Contacts quarantined                          |
| <i>Lyngse et al.</i> <sup>34</sup>       | Denmark                    | February 27 to July 24, 2020      | Passive            | 990   | Symptomatic or asymptomatic | –                                             |
| <i>Malheiro et al.</i> <sup>35</sup>     | Eastern Porto, Portugal    | March 1, 2020 to April 30, 2020   | Active and passive | 453   | Symptomatic                 | Cases isolated                                |
| <i>Park, Choe et al.</i> <sup>36</sup>   | South Korea                | January 20 to March 27, 2020      | Active and passive | 5,706 | Symptomatic or asymptomatic | Contacts quarantined                          |
| <i>Park, Kim et al.</i> <sup>37</sup>    | Seoul, South Korea         | February 21 to March 8, 2020      |                    | 97    | Symptomatic or asymptomatic | Index cases isolated and contacts quarantined |
| <i>Patel et al.</i> <sup>38</sup>        | London, UK                 | March 1 to April 1, 2020          | Active and passive | 141   | Symptomatic                 | Cases isolateds                               |
| <i>Phiriyasart et al.</i> <sup>39</sup>  | Pattani Province, Thailand | March 30 to April 20, 2020        | Passive            | 25    | Symptomatic                 | –                                             |
| <i>Rosenberg et al.</i> <sup>40</sup>    | New York, USA              | March 2 to March 12, 2020         | Active and passive | 229   | Symptomatic or asymptomatic | –                                             |
| <i>Shah et al.</i> <sup>41</sup>         | Gujarat, India             | March 28 to July 2, 2020          | Passive            | 74    | Symptomatic                 | –                                             |
| <i>Son et al.</i> <sup>42</sup>          | Busan, South Korea         | January 16 to March 24, 2020      | Active and passive | 108   | Symptomatic or asymptomatic | Contacts quarantined                          |
| <i>Sun et al.</i> <sup>43</sup>          | Zhejiang Province, China   | January 20 to February 10, 2020   | Active and passive | 148   | Symptomatic or asymptomatic | –                                             |
| <i>Teherani et al.</i> <sup>44</sup>     | Atlanta, USA               | March 16 to June 14, 2020         | Passive            | 32    | Symptomatic                 | –                                             |
| <i>van der Hoek et al.</i> <sup>45</sup> | Netherlands                | March to April 2, 2020            | Passive            | 54    | Symptomatic                 | –                                             |
| <i>Wang, Ma et al.</i> <sup>46</sup>     | Wuhan, China               | February 13 and February 14, 2020 | Passive            | 85    | Symptomatic                 | Contacts quarantined                          |
| <i>Wang, Pan et al.</i> <sup>47</sup>    | Beijing, China             | January 1 to April 3, 2020        | Active and passive | 585   | Symptomatic or asymptomatic | Contacts quarantined                          |
| <i>Wang, Tian et al.</i> <sup>48</sup>   | Beijing, China             | February 21, 2020                 | Passive            | 41    | Symptomatic                 | Cases isolated                                |
| <i>Wang, Zhou et al.</i> <sup>49</sup>   | Wuhan, China               | January 5 to 12 February, 2020    | Active             | 25    | Symptomatic                 | Contacts quarantined                          |

|                                          |                           |                                 |                    |     |                             |                                         |
|------------------------------------------|---------------------------|---------------------------------|--------------------|-----|-----------------------------|-----------------------------------------|
| <i>Wu, Huang et al.</i> <sup>50</sup>    | Zhuhai, China             | January 17 to February 29, 2020 | Active and passive | 35  | Symptomatic or asymptomatic | Cases isolated                          |
| <i>Wu, Song et al.</i> <sup>51</sup>     | Hangzhou, China           | January 23 to February 28, 2020 | Active and passive | 144 | Symptomatic or asymptomatic | Cases isolated                          |
| <i>Xin et al.</i> <sup>52</sup>          | Qingdao Municipal, China  | January 20 to March 27, 2020    | Active and passive | 31  | Symptomatic or asymptomatic | Cases isolated                          |
| <i>Yu et al.</i> <sup>53</sup>           | Wuhan, China              | January 14 to February 14, 2020 | –                  | 560 | Symptomatic                 | Contacts quarantined                    |
| <i>Yung et al.</i> <sup>54</sup>         | Singapore                 | March 5 to April 30, 2020       | Passive            | 223 | Symptomatic                 | Cases isolated and contacts quarantined |
| <i>Zhang, Cheng et al.</i> <sup>55</sup> | China                     | January 28 to March 15, 2020    | Active             | 359 | Symptomatic or asymptomatic | Contacts quarantined                    |
| <i>Zhang, Zhou et al.</i> <sup>56</sup>  | Liaocheng, China          | January 13 to 26, 2020          | Active             | 11  | Symptomatic or asymptomatic | Cases isolated                          |
| <i>Zhuang et al.</i> <sup>57</sup>       | Guangdong Province, China | January 1 to February 29, 2020  | Passive            | 283 | Symptomatic                 | –                                       |

<sup>a</sup>Active surveillance: (e.g., travelers from areas with active SARS-CoV-2 transmission; individuals detected by neighborhood fever screenings).

**eTable 4. Description of Contacts for Studies Included in Review of Household Transmissibility of SARS-CoV-2**

|                                          | Contact type (household, family) | Test used to diagnosis contacts                  | Universal testing or only symptomatic | Number of tests per contact                           | Follow up duration (days) | Household/family overall secondary attack rate | Close contact secondary attack rate |
|------------------------------------------|----------------------------------|--------------------------------------------------|---------------------------------------|-------------------------------------------------------|---------------------------|------------------------------------------------|-------------------------------------|
| <i>Adamik et al.</i> <sup>4</sup>        | Household                        | –                                                | Symptomatic                           | –                                                     | –                         | 11.1% (3,553/32,023)                           | –                                   |
| <i>Arnedo-Pena et al.</i> <sup>5</sup>   | Household                        | Symptom-based diagnosis (no testing of contacts) | Symptomatic                           | 0                                                     | –                         | 11.1% (83/745)                                 | –                                   |
| <i>Bae et al.</i> <sup>6</sup>           | Household                        | RT-PCR                                           | Symptomatic                           | 1                                                     | 14                        | 21.6% (37/200)                                 | 6.4% (108/1,687)                    |
| <i>Bi et al.</i> <sup>7</sup>            | Household                        | RT-PCR                                           | Symptomatic and asymptomatic          | 1                                                     | 14                        | 11.2% (77/686)                                 | 7.6% (98/1,286)                     |
| <i>Böhmer et al.</i> <sup>8</sup>        | Household                        | RT-PCR and whole genome sequencing               | Symptomatic and asymptomatic          | Multiple                                              | 14                        | 20.8% (5/24)                                   | 6.6% (16/241)                       |
| <i>Boscolo-Rizzo et al.</i> <sup>9</sup> | Household                        | RT-PCR                                           | Symptomatic                           | 1                                                     | 14                        | 43.0% (54/121)                                 | –                                   |
| <i>Burke et al.</i> <sup>10</sup>        | Household                        | –                                                | Symptomatic                           | 1                                                     | 14                        | 10.5% (2/19)                                   | 0.4% (2/445)                        |
| <i>Chaw et al.</i> <sup>11</sup>         | Household                        | RT-PCR                                           | Symptomatic and asymptomatic          | Tested all contacts once; extra tests for symptomatic | 14                        | 10.6% (28/264)                                 | 2.9% (51/1,755)                     |
| <i>Chen et al.</i> <sup>12</sup>         | Family                           | Nucleic acid test                                | Symptomatic and asymptomatic          | Multiple                                              | 21                        | 18.0% (49/272)                                 | 6.1% (132/2,147)                    |
| <i>Cheng et al.</i> <sup>13</sup>        | Household                        | RT-PCR                                           | Symptomatic                           | Tested all contacts once; extra tests for symptomatic | 14                        | 6.6% (10/151)                                  | 0.8% (22/2,761)                     |
| <i>Dattner et al.</i> <sup>14</sup>      | Household                        | RT-PCR                                           | Symptomatic                           | Tested all contacts once; extra tests for symptomatic | –                         | 34.7% (981/2824)                               | –                                   |



|                                            |           |                      |                              |                                                       |    |                   |                   |
|--------------------------------------------|-----------|----------------------|------------------------------|-------------------------------------------------------|----|-------------------|-------------------|
| <i>Dawson et al.</i> <sup>15</sup>         | Household | RT-PCR               | Symptomatic and asymptomatic | Tested all contacts once; extra tests for symptomatic | –  | 25.0% (16/64)     | –                 |
| <i>Dong et al.</i> <sup>16</sup>           | Family    | RT-PCR               | Symptomatic and asymptomatic | Multiple                                              | –  | 20.5% (53/259)    | –                 |
| <i>Doung-ngern et al.</i> <sup>17</sup>    | Household | RT-PCR               | Asymptomatic                 | 1                                                     | 21 | 16.5% (38/230)    | –                 |
| <i>Draper et al.</i> <sup>18</sup>         | Household | RT-PCR               | Symptomatic                  | 1                                                     | 14 | 3.9% (2/51)       | 0.9% (4/445)      |
| <i>Fateh-Moghadam et al.</i> <sup>19</sup> | Household | RT-PCR               | Symptomatic                  | 1                                                     | 14 | 14.1% (500/3,546) | 13.4% (840/6,255) |
| <i>Han et al.</i> <sup>20</sup>            | Household | RT-PCR               | Symptomatic and asymptomatic | Tested all contacts once; extra tests for symptomatic | 14 | 21.4% (3/14)      | 19.4% (7/36)      |
| <i>Hu et al.</i> <sup>21</sup>             | Household | RT-PCR               | Symptomatic and asymptomatic | 1                                                     | 14 | 17.7% (491/2771)  | 3.0% (471/15,648) |
| <i>Hua et al.</i> <sup>22</sup>            | Family    | RT-PCR               | Symptomatic and asymptomatic | 1                                                     | –  | 18.1% (151/835)   | –                 |
| <i>Islam et al.</i> <sup>23</sup>          | Household | –                    | Symptomatic and asymptomatic | 1                                                     | 14 | 13.0% (6/46)      | –                 |
| <i>Jing et al.</i> <sup>24</sup>           | Household | RT-PCR or sequencing | Symptomatic and asymptomatic | Multiple                                              | 14 | 17.1% (93/542)    | –                 |
| <i>Kim et al.</i> <sup>25</sup>            | Household | RT-PCR               | Symptomatic and asymptomatic | 1                                                     | 14 | 0.5% (1/208)      | –                 |
| <i>Korea CDC</i> <sup>26</sup>             | Household | –                    | Symptomatic                  | 1                                                     | 14 | 7.6% (9/119)      | 0.5% (13/2,370)   |
| <i>Laxminarayan et al.</i> <sup>27</sup>   | Household | RT-PCR               | Symptomatic and asymptomatic | 1                                                     | 14 | 9.0% (380/4065)   | 13.4% (623/4,637) |
| <i>Lee et al.</i> <sup>28</sup>            | Household | RT-PCR               | Symptomatic and asymptomatic | 1                                                     | –  | 4.3% (1/23)       | –                 |

|                                          |           |                                |                              |                                                       |    |                      |                    |
|------------------------------------------|-----------|--------------------------------|------------------------------|-------------------------------------------------------|----|----------------------|--------------------|
| <i>Lewis et al.</i> <sup>29</sup>        | Household | RT-PCR                         | Symptomatic and asymptomatic | Tested all contacts once; extra tests for symptomatic | 14 | 29.3% (55/188)       | –                  |
| <i>Li et al.</i> <sup>30</sup>           | Household | RT-PCR                         | Symptomatic and asymptomatic | Tested all contacts once; extra tests for symptomatic | 14 | 16.3% (64/392)       | –                  |
| <i>Liu et al.</i> <sup>31</sup>          | Family    | RT-PCR                         | Symptomatic and asymptomatic | Multiple                                              | 14 | 13.5% (330/2441)     | 4.4% (515/11,580)  |
| <i>Lopez Bernal et al.</i> <sup>32</sup> | Household | RT-PCR                         | Symptomatic                  | 1                                                     | 14 | 34.1% (161/472)      | –                  |
| <i>Luo et al.</i> <sup>33</sup>          | Household | RT-PCR                         | Symptomatic and asymptomatic | Multiple                                              | 14 | 10.2% (105/1015)     | 3.7% (127/3,410)   |
| <i>Lyngse et al.</i> <sup>34</sup>       | Household | –                              | Symptomatic and asymptomatic | 1                                                     | 14 | 16.7% (371/2226)     | –                  |
| <i>Malheiro et al.</i> <sup>35</sup>     | Household | RT-PCR                         | Symptomatic                  | 1                                                     | 14 | 10.5% (72/685)       | 9.5% (154/1,627)   |
| <i>Park, Choe et al.</i> <sup>36</sup>   | Household | RT-PCR                         | Symptomatic and asymptomatic | Multiple                                              | 14 | 11.8% (1,248/10,592) | 3.7% (2169/59,073) |
| <i>Park, Kim et al.</i> <sup>37</sup>    | Household | RT-PCR                         | Symptomatic and asymptomatic | 1                                                     | 14 | 15.1% (34/225)       | –                  |
| <i>Patel et al.</i> <sup>38</sup>        | Household | COVID-19 symptoms (no testing) | Symptomatic                  | 0                                                     | –  | 43.0% (79/185)       | –                  |
| <i>Phiriyasart et al.</i> <sup>39</sup>  | Household | RT-PCR                         | Symptomatic and asymptomatic | Additional tests after initial negative               | 14 | 11.3% (12/106)       | 6.5% (25/387)      |
| <i>Rosenberg et al.</i> <sup>40</sup>    | Household | Molecular SARS-CoV-2 tests     | Symptomatic and asymptomatic | 1                                                     | –  | 38.0% (131/343)      | –                  |
| <i>Shah et al.</i> <sup>41</sup>         | Household | RT-PCR                         | Symptomatic                  | 1                                                     | 28 | 8.8% (34/386)        | –                  |

|                                          |           |                                      |                              |                                                       |    |                  |                  |
|------------------------------------------|-----------|--------------------------------------|------------------------------|-------------------------------------------------------|----|------------------|------------------|
| <i>Son et al.</i> <sup>42</sup>          | Household | RT-PCR                               | Symptomatic and asymptomatic | 1                                                     | –  | 8.2% (16/196)    | –                |
| <i>Sun et al.</i> <sup>43</sup>          | Household | –                                    | Symptomatic                  | 1                                                     | –  | 31.6% (189/598)  | –                |
| <i>Teherani et al.</i> <sup>44</sup>     | Household | Symptom-based diagnosis (no testing) | Symptomatic                  | 0                                                     | –  | 28.7% (31/108)   | –                |
| <i>van der Hoek et al.</i> <sup>45</sup> | Family    | RT-PCR and serological diagnostics   | Symptomatic and asymptomatic | Multiple                                              | 21 | 27.0% (47/174)   | –                |
| <i>Wang, Ma et al.</i> <sup>46</sup>     | Household | RT-PCR                               | Symptomatic                  | 1                                                     | 14 | 30% (47/155)     | –                |
| <i>Wang, Pan et al.</i> <sup>47</sup>    | Household | RT-PCR, gene sequencing              | –                            | Tested all contacts once; extra tests for symptomatic | 14 | 15.6% (111/714)  | 4.6% (186/4,007) |
| <i>Wang, Tian et al.</i> <sup>48</sup>   | Household | RT-PCR, gene sequencing              | Symptomatic and asymptomatic | 1                                                     | 14 | 23.0% (77/335)   | –                |
| <i>Wang, Zhou et al.</i> <sup>49</sup>   | Family    | Nucleotide tests                     | Symptomatic                  |                                                       | –  | 23.3% (10/43)    | –                |
| <i>Wu, Huang et al.</i> <sup>50</sup>    | Household | RT-PCR                               | Symptomatic and asymptomatic | Multiple                                              | 21 | 32.4% (48/148)   | –                |
| <i>Wu, Song et al.</i> <sup>51</sup>     | Household | –                                    | Symptomatic and asymptomatic | 1                                                     | 14 | 17.9% (50/280)   | 2.7 (82/2,994)   |
| <i>Xin et al.</i> <sup>52</sup>          | Household | RT-PCR                               | Symptomatic and asymptomatic | Multiple                                              | 14 | 17.9% (19/106)   | –                |
| <i>Yu et al.</i> <sup>53</sup>           | Family    | –                                    | –                            | 1                                                     | 14 | 10.2% (143/1396) | 9.5% (150/1,587) |
| <i>Yung et al.</i> <sup>54</sup>         | Household | RT-PCR                               | Symptomatic and asymptomatic | 1                                                     | 14 | 6.1% (13/200)    | –                |
| <i>Zhang, Cheng et al.</i> <sup>55</sup> | Household | Nucleic acid tests                   | Symptomatic and asymptomatic | Tested all contacts once; extra                       | –  | 16.1% (10/62)    | 3.3% (12/369)    |

|                                         |        |        |                              | tests for symptomatic |   |                 |                  |
|-----------------------------------------|--------|--------|------------------------------|-----------------------|---|-----------------|------------------|
| <i>Zhang, Zhou et al.</i> <sup>56</sup> | Family | RT-PCR | Symptomatic and asymptomatic | 1                     | – | 12.9% (12/93)   | –                |
| <i>Zhuang et al.</i> <sup>57</sup>      | Family | –      | Symptomatic and asymptomatic | 1                     | – | 7.5% (276/3697) | 2.9% (239/8,319) |

**eTable 5. Overdispersion of the Number of Secondary Infections of SARS-CoV-2 per Household**

| <b>Author</b>            | <b>Location</b>               | <b>Average number of contacts per household</b> | <b>Secondary attack rate</b> | <b>Proportion of households reporting any secondary transmission from index cases</b> | <b>Probability of <math>\geq 1</math> secondary infection in a household<sup>a</sup></b> |
|--------------------------|-------------------------------|-------------------------------------------------|------------------------------|---------------------------------------------------------------------------------------|------------------------------------------------------------------------------------------|
| <i>Wu, Huang et al.</i>  | Zhuhai, China                 | 4.229                                           | 0.324                        | 0.629                                                                                 | 0.809                                                                                    |
| <i>Rosenberg et al.</i>  | New York, USA                 | 3.330                                           | 0.382                        | 0.612                                                                                 | 0.799                                                                                    |
| <i>Lewis et al.</i>      | Utah & Wisconsin, USA         | 3.241                                           | 0.277                        | 0.552                                                                                 | 0.650                                                                                    |
| <i>Wang, Tian et al.</i> | Beijing, China                | 2.702                                           | 0.230                        | 0.331                                                                                 | 0.506                                                                                    |
| <i>Shah et al.</i>       | Gujarat, India                | 5.216                                           | 0.088                        | 0.216                                                                                 | 0.382                                                                                    |
| <i>Yung et al.</i>       | Singapore                     | 1.493                                           | 0.065                        | 0.052                                                                                 | 0.095                                                                                    |
| <i>Draper et al.</i>     | Northern Territory, Australia | 1.821                                           | 0.039                        | 0.036                                                                                 | 0.070                                                                                    |

<sup>a</sup>To examine for potential over-dispersion, we crudely assume that all households have size equal to the average number of contacts and equal secondary attack rate. Then,  $\Pr[\geq 1 \text{ secondary infection in a household}] = 1 - (1 - SAR)^n$ , where  $n$  is the average number of contacts for that study. This is a crude analysis that does not consider heterogeneity in household size. Given this limitation, statistical significance is not assessed, with results intended for illustration only.

**eTable 6. Assessment of Factors Potentially Affecting Susceptibility and Infectivity of SARS-CoV-2 in Household Transmission Studies**

| <b>Risk factors</b>                        | <b>Overall number of studies</b> | <b>Number of studies reporting significant associations</b> |
|--------------------------------------------|----------------------------------|-------------------------------------------------------------|
| <b>Susceptibility (of contacts)</b>        |                                  |                                                             |
| Age                                        | 23                               | 14                                                          |
| Sex                                        | 19                               | 3                                                           |
| Exposure period (to index case)            | 7                                | 3                                                           |
| Relationship                               | 6                                | 4                                                           |
| Underlying medical conditions              | 1                                | 1                                                           |
| BMI                                        | 1                                | 0                                                           |
| Comorbidity                                | 1                                | 0                                                           |
| Educational attainment                     | 1                                | 0                                                           |
| Race/ethnicity                             | 1                                | 0                                                           |
| <b>Infectivity (of index case)</b>         |                                  |                                                             |
| Clinical severity                          | 9                                | 6                                                           |
| Age                                        | 9                                | 3                                                           |
| Sex                                        | 9                                | 3                                                           |
| Cough                                      | 8                                | 2                                                           |
| Fever                                      | 6                                | 0                                                           |
| Diarrhea                                   | 3                                | 1                                                           |
| Myalgia                                    | 3                                | 1                                                           |
| Comorbidity                                | 3                                | 0                                                           |
| Fatigue                                    | 3                                | 0                                                           |
| Hospitalization                            | 2                                | 2                                                           |
| Pneumonia                                  | 2                                | 2                                                           |
| Expectoration                              | 2                                | 1                                                           |
| Lymphocyte count                           | 2                                | 1                                                           |
| Educational attainment                     | 2                                | 0                                                           |
| Acute respiratory distress syndrome/sepsis | 1                                | 1                                                           |
| Chills                                     | 1                                | 1                                                           |
| Comorbidity                                | 1                                | 1                                                           |
| Dizziness                                  | 1                                | 1                                                           |
| Health profession                          | 1                                | 1                                                           |
| Neutrophil percentage                      | 1                                | 1                                                           |

|                                                             |   |   |
|-------------------------------------------------------------|---|---|
| Abdominal pain                                              | 1 | 0 |
| Arthralgia                                                  | 1 | 0 |
| BMI                                                         | 1 | 0 |
| Chest tightness                                             | 1 | 0 |
| Dyspnea                                                     | 1 | 0 |
| Headache                                                    | 1 | 0 |
| Nasal congestion                                            | 1 | 0 |
| Nausea                                                      | 1 | 0 |
| Palpitation                                                 | 1 | 0 |
| Pharyngalgia                                                | 1 | 0 |
| Poor appetite                                               | 1 | 0 |
| Race/ethnicity                                              | 1 | 0 |
| Rhinorrhea                                                  | 1 | 0 |
| Vomiting                                                    | 1 | 0 |
| White blood cell count                                      | 1 | 0 |
| <b>Awareness and behavioral factors</b>                     |   |   |
| Contact frequency                                           | 6 | 5 |
| Shared vehicle (with index case)                            | 6 | 5 |
| Contacts wore face masks                                    | 4 | 4 |
| Shared meal                                                 | 3 | 2 |
| Self-isolated after illness onset                           | 3 | 1 |
| Wear mask at home after illness onset                       | 3 | 1 |
| Time interval from illness onset to hospital admission      | 3 | 0 |
| Physical contact                                            | 2 | 2 |
| Disinfectant use <sup>a</sup>                               | 2 | 1 |
| Ventilation duration <sup>a</sup>                           | 2 | 1 |
| Contacts smoking status                                     | 2 | 0 |
| Index case eats with separate tableware                     | 2 | 0 |
| Index case smoking status                                   | 2 | 0 |
| Time interval from illness onset to laboratory confirmation | 2 | 0 |
| Contacts hand hygiene                                       | 1 | 1 |
| Knowledge of own infectiousness after illness onset         | 1 | 1 |
| Shared cigarette                                            | 1 | 1 |
| Shared living room                                          | 1 | 1 |
| Frequency of room cleaning (wet type)                       | 1 | 0 |
| Index case hand hygiene                                     | 1 | 0 |
| Index case slept in separate bedroom                        | 1 | 0 |
| Index case used private bathroom                            | 1 | 0 |

|                                                                                                       |   |   |
|-------------------------------------------------------------------------------------------------------|---|---|
| Knowledge score on COVID-19 before illness onset                                                      | 1 | 0 |
| Self-awareness of being infected with SARS-CoV-2 when developed illness                               | 1 | 0 |
| Time interval from illness onset to medical isolation                                                 | 1 | 0 |
| <b>Household characteristics</b>                                                                      |   |   |
| Number of people in household                                                                         | 7 | 4 |
| Number of washrooms                                                                                   | 2 | 0 |
| Residential area per person                                                                           | 2 | 0 |
| Number of bedrooms per person                                                                         | 1 | 0 |
| Separate dining area                                                                                  | 1 | 0 |
| Urban/rural residence                                                                                 | 1 | 0 |
| <sup>a</sup> Includes one study that combined ventilation and disinfection, which was not significant |   |   |



**eTable 7. Household Secondary Attack Rate Comparison With Other Viruses**

|                                          | Location                               | Number of index cases                        | Overall household secondary attack rate                                       | Definition of household contact | Case ascertainment                                          |
|------------------------------------------|----------------------------------------|----------------------------------------------|-------------------------------------------------------------------------------|---------------------------------|-------------------------------------------------------------|
| <b>Middle East Respiratory Syndrome</b>  |                                        |                                              |                                                                               |                                 |                                                             |
| <i>Al Hosani et al.</i> <sup>58</sup>    | Abu Dhabi, United Arab Emirates        | 34                                           | 0% (0/105)                                                                    | Household contacts              | RT-PCR                                                      |
| <i>Arwady et al.</i> <sup>59</sup>       | Al-Qouz, Saudi Arabia                  | 5                                            | 24% (19/79)                                                                   | Family contacts                 | RT-PCR                                                      |
| <i>Assiri et al.</i> <sup>60</sup>       | Al-Hasa, Saudi Arabia                  | 23                                           | 2.3% (5/217)                                                                  | Household contacts              | RT-PCR                                                      |
| <i>Drosten et al.</i> <sup>61</sup>      | Saudi Arabia                           | 26                                           | 4% (12/280)                                                                   | Household contacts              | RT-PCR                                                      |
| <i>Memish et al.</i> <sup>62</sup>       | Al-Madinah al-Munawwarah, Saudi Arabia | 18                                           | 1.8% (1/56)                                                                   | Household contacts              | RT-PCR                                                      |
| <i>Payne et al.</i> <sup>63</sup>        | Jordan                                 | 16                                           | 9% (2/23)                                                                     | Household contacts              | RT-PCR                                                      |
| <i>Van Kerkhove et al.</i> <sup>64</sup> | Riyadh, Saudi Arabia                   | 7                                            | 5.1% (12/234.5)                                                               | Household contacts              | RT-PCR                                                      |
| <b>SARS-CoV</b>                          |                                        |                                              |                                                                               |                                 |                                                             |
| <i>Chan et al.</i> <sup>65</sup>         | Hong Kong, China                       | 99                                           | 12.3% (30/243)                                                                | Household contacts              | Positive contacts identified by the Hong Kong SARS registry |
| <i>Goh et al.</i> <sup>66</sup>          | Singapore                              | 114                                          | 6.2% (26/417)                                                                 | Household contacts              | PCR or serologic test                                       |
| <i>Lau et al.</i> <sup>67</sup>          | Hong Kong, China                       | 881                                          | 8% (188/2139)                                                                 | Household contacts              | Symptomatic probable cases (no testing)                     |
| <i>Ou et al.</i> <sup>68</sup>           | Beijing, China                         | 232                                          | 3.3% (18/550)                                                                 | Household contacts              | –                                                           |
| <i>Pang et al.</i> <sup>69</sup>         | Beijing, China                         | 582                                          | 11.4% (111/973)                                                               | Household contacts              | Symptom-based diagnosis (no testing)                        |
| <i>Tuan et al.</i> <sup>70</sup>         | Vietnam                                | 45                                           | 2.4% (3/123)                                                                  | Household contacts              | RT-PCR                                                      |
| <i>Wilson-Clark et al.</i> <sup>71</sup> | Toronto, Canada                        | 74                                           | 10.2% (18/176)                                                                | Household contacts              | Symptom-based diagnosis (no testing)                        |
| <b>Other coronaviruses</b>               |                                        |                                              |                                                                               |                                 |                                                             |
| <i>Beale et al.</i> <sup>72</sup>        | England, UK                            | 70 HCoV-OC43<br>45 HCoV-229E<br>55 HCoV-NL63 | HCoV-OC43: 13.2% (7/53)<br>HCoV-229E: 10.1% (7/69)<br>HCoV-NL63: 11.9% (5/42) | Household contacts              | RT-PCR                                                      |
| <i>Esposito et al.</i> <sup>73</sup>     | Milan, Italy                           | 33 HCoV-229E<br>13 HCoV-NL63<br>11 HCoV-OC43 | HCoV-229E: 14.9% (14/94)<br>HCoV-NL63: 0% (0/45)<br>HCoV-OC43: 13.2% (5/38)   | Household contacts              | RT-PCR                                                      |

|                                   |                                          |                                                                  |                                                                                                                                             |                    |        |
|-----------------------------------|------------------------------------------|------------------------------------------------------------------|---------------------------------------------------------------------------------------------------------------------------------------------|--------------------|--------|
| <i>Monto et al.</i> <sup>74</sup> | Michigan, USA                            | 263 HCoV-OC43<br>113 HCoV-229E<br>141 HCoV-HKU1<br>217 HCoV-NL63 | HCoV-OC43: 10.6%<br>HCoV-229E: 7.2%<br>HCoV-HKU1: 8.6%<br>HCoV-NL63: 12.6%                                                                  | Household contacts | RT-PCR |
| <b>Influenza</b>                  |                                          |                                                                  |                                                                                                                                             |                    |        |
| <i>Tseng et al.</i> <sup>1</sup>  | Review of household transmission studies |                                                                  | SAR ranged from 1–38% based on PCR-confirmed infection, 6–35% based on influenza-like illness, and 3–31% based on acute respiratory illness |                    |        |

**eTable 8. Weights for Combined Estimate of Secondary Attack Rates of Severe Acute Respiratory Syndrome Coronavirus 2 (SARS-CoV-2) for Household Contacts and Family Contacts**

| Authors, Location                                           | Weight |
|-------------------------------------------------------------|--------|
| Boscolo–Rizzo et al, <sup>9</sup> Treviso Province, Italy   | 1.53%  |
| Patel et al, <sup>38</sup> London, UK                       | 1.73%  |
| Rosenberg et al, <sup>40</sup> New York, USA                | 1.97%  |
| Dattner et al, <sup>14</sup> Bnei Brak, Israel              | 2.27%  |
| Lopez Bernal et al, <sup>32</sup> U.K.                      | 2.06%  |
| Wu, Huang et al, <sup>50</sup> Zhuhai, China                | 1.66%  |
| Sun et al, <sup>43</sup> Zhejiang Province, China           | 2.11%  |
| Wang, Ma et al, <sup>46</sup> Wuhan, China                  | 1.69%  |
| Teherani et al, <sup>44</sup> Atlanta, USA                  | 1.52%  |
| Lewis et al, <sup>29</sup> Utah & Wisconsin, USA            | 1.78%  |
| van der Hoek et al, <sup>45</sup> Netherlands               | 1.75%  |
| Dawson et al, <sup>15</sup> Wisconsin, USA                  | 1.25%  |
| Wang, Zhou et al, <sup>49</sup> Wuhan, China                | 1.04%  |
| Wang, Tian et al, <sup>48</sup> Beijing, China              | 2.00%  |
| Han et al, <sup>20</sup> South Korea                        | 0.50%  |
| Böhmer et al, <sup>8</sup> Bavaria, Germany                 | 0.74%  |
| Dong et al, <sup>16</sup> Tianjin, China                    | 1.94%  |
| Bae et al, <sup>6</sup> Cheonan, Korea                      | 1.86%  |
| Hua et al, <sup>22</sup> Zhejiang Province, China           | 2.19%  |
| Chen et al, <sup>12</sup> Ningbo, China                     | 1.97%  |
| Xin et al, <sup>52</sup> Qingdao Municipal, China           | 1.59%  |
| Wu, Song et al, <sup>51</sup> Hangzhou, China               | 1.98%  |
| Hu et al, <sup>21</sup> Hunan, China                        | 2.27%  |
| Jing et al, <sup>24</sup> Guangzhou, China                  | 2.13%  |
| Lyngse et al, <sup>34</sup> Denmark                         | 2.27%  |
| Doung-ngern et al, <sup>17</sup> Thailand                   | 1.92%  |
| Li et al, <sup>30</sup> Wuhan, China                        | 2.07%  |
| Zhang, Cheng et al, <sup>55</sup> China                     | 1.33%  |
| Wang, Pan et al, <sup>47</sup> Beijing, China               | 2.18%  |
| Park, Kim et al, <sup>37</sup> Seoul, South Korea           | 1.93%  |
| Fateh–Moghadam et al, <sup>19</sup> Trento, Italy           | 2.29%  |
| Liu et al, <sup>31</sup> Guangdong Province, China          | 2.27%  |
| Islam et al, <sup>23</sup> Chattogram, Bangladesh           | 1.21%  |
| Zhang, Zhou et al, <sup>56</sup> Liaocheng, China           | 1.59%  |
| Park, Choe et al, <sup>36</sup> South Korea                 | 2.31%  |
| Phiriyasart et al, <sup>39</sup> Pattani Province, Thailand | 1.68%  |
| Bi et al, <sup>7</sup> Shenzhen, China                      | 2.19%  |
| Arnedo–Pena et al, <sup>5</sup> Castellon, Spain            | 2.20%  |

|                                                           |       |
|-----------------------------------------------------------|-------|
| Adamik et al, <sup>4</sup> Poland                         | 2.31% |
| Malheiro et al, <sup>35</sup> Eastern Porto, Portugal     | 2.20% |
| Chaw et al, <sup>11</sup> Brunei                          | 2.02% |
| Burke et al, <sup>10</sup> USA                            | 0.77% |
| Luo et al, <sup>33</sup> Guangzhou, China                 | 2.23% |
| Yu et al, <sup>53</sup> Wuhan, China                      | 2.25% |
| Laxminarayan et al, <sup>27</sup> TN & AP, India          | 2.29% |
| Shah et al, <sup>41</sup> Gujarat, India                  | 2.12% |
| Son et al, <sup>42</sup> Busan, South Korea               | 1.97% |
| Korea CDC, <sup>26</sup> South Korea                      | 1.81% |
| Zhuang et al, <sup>57</sup> Guangdong Province, China     | 2.29% |
| Cheng et al, <sup>13</sup> Taiwan                         | 1.92% |
| Yung et al, <sup>54</sup> Singapore                       | 2.00% |
| Lee et al, <sup>28</sup> Busan, South Korea               | 1.10% |
| Draper et al, <sup>18</sup> Northern Territory, Australia | 1.57% |
| Kim et al, <sup>25</sup> South Korea                      | 2.22% |
|                                                           | 100%  |

## **eAppendix 1. Eligibility Criteria**

We included articles with original data for estimating household secondary attack rate of SARS-CoV-2. The publication must report at least two of numerator, denominator, and secondary attack rate among household contacts. Where numerators (numbers of infected/sick contacts) or denominators (numbers of contacts) were not reported but the number of index cases and secondary attack rate were available, the denominator was calculated acknowledging limits of significant digits. We did not contact authors for additional data.

Household transmission of SARS-CoV-2 is described in case reports in narrative form of individual families or households with large numbers of cases, and contact tracing investigations whereby investigators identify the number of infected household or family members from index cases, usually over a period of 14 or 21 days. We excluded studies that 1) were case reports of individual families or households as these can bias results towards high attack rates, 2) reported infection prevalence in the household without describing transmission, 3) tested household contacts using antibody tests as antibodies may be detected many weeks after infection,<sup>75</sup> 4) were of close contacts that did not report secondary attack rates for household or family members, 5) were preprints of published articles already included in the review, and 6) had overlapping populations with another study already included in the review. We used the same eligibility criteria for studies of other coronaviruses. One reviewer first screened studies by titles and abstracts to identify potential studies for inclusion. One reviewer subsequently evaluated full-text articles and selected those that met the inclusion criteria.

## eAppendix 2. Data Extraction

One reviewer extracted the following information for studies of SARS-CoV-2: first author, location, index case identification period, index case identification method, number of index cases, index case symptom status, transmission mitigation strategies, household/family/close contact type, test used to diagnose contacts, universal/symptomatic testing, number of tests per contact, follow-up duration, number of infected household contacts, total number of household contacts, household secondary attack rate, and transmission risk factors. For studies that reported secondary attack rates for both household and family contacts, only the household contact secondary attack rate was extracted. For studies that included secondary attack rates for close contacts, we also extracted the number of infected close contacts, total number of close contacts, and close contact secondary attack rate.

For studies of other coronaviruses, one reviewer extracted: first author, location, number of index cases, number of infected contacts, total number of contacts, secondary attack rate, contact type, and test used to diagnose contacts. For influenza, we extracted secondary attack rate ranges reported in the review.

The following methods describe how secondary attack rates were calculated and how specific covariates were categorized if there was ambiguity during the process of data extraction:

### SARS-CoV-2

- *Bi et al.*<sup>7</sup>: Contact age was reported in increments of ten years (0-9, 10-19,...), which we categorized into 0-19 and  $\geq 20$  years (child category therefore includes 18 and 19 years).
- *Böhmer et al.*<sup>8</sup>: SAR reported as 75.0% (95% CI 19.0–99.0%; 3/4) among members of a household cluster in common isolation and 10.0% (1.2–32.0%; 2/20) among household contacts only together until isolation of the patient, so overall SAR=5/24=20.8%.
- *Chaw et al.*<sup>11</sup>: There were 12 infections among 85 children, 13 infections among 31 spouses, and 3 infections among 148 other household contacts, so overall household SAR=28/264=10.6%, children SAR=12/85=14.1%, and adult SAR=16/179=8.9%.
- *Chen et al.*<sup>12</sup>: Family SAR (18.01%) and total number of family members (272) were provided, so the number of infected family members=.1801\*272=49.
- *Cheng et al.*<sup>13</sup>: Total number of household secondary cases (10) and number of household contacts (151) were provided, so overall household SAR=10/151=6.6%. Contact age was reported as 0-19; 20-39; 40-59;  $\geq 60$ , which we categorized into 0-19 years and  $\geq 20$  years (children category includes 18 and 19 years).
- *Dattner et al.*<sup>14</sup>: This study reported a total of 1544 children including index cases, 512 of which were infected (33%). Excluding the index cases, they reported that 25% of children were infected, but did not provide the numerator or denominator. Therefore, we estimated the number of index cases, secondary infections, and total contacts by solving for x:  $(512-x)/(1544-x)=.25$ ;  $x=168$  index cases;  $512-168=344$  secondary infections among children;  $1544-168=1376$  total contacts. This study also reported a total of 1809 adults including index cases, 998 of which were infected (55%). Excluding the index cases, they reported 44% of adults were infected, but did not provide the numerator or denominator. Solving again for x, we estimate there were:  $(998-x)/(1809-x)=.44$ ;  $x=361$  index cases;  $998-361=637$  secondary infections among adults;  $1809-361=1448$  total contacts. The total number of infected secondary infections=344+637=981, the total number of contacts=1376+1448=2824, and overall SAR=981/2824=34.7%.
- *Draper et al.*<sup>18</sup>: This study reported 2 infections among 51 total household contacts, both from the same household. The total number of households were not reported, but since there were 28 total index cases, we assumed there were 28 households and 1/28 households (3.6%) had secondary infections.
- *Hu et al.*<sup>21</sup>: Number of household contacts (2,771) and SAR (17.7%) provided, so number of infected contacts=491.
- *Hua et al.*<sup>22</sup>: This study reported 151 total infections and 684 negative results, so overall SAR=151/835=18.1%.
- *Jing et al.*<sup>24</sup>: We calculated the total number of household contacts at the same residential address as the number of household secondary cases (93) plus the number of uninfected household contacts (449), which is 542. The total number of female contacts = 53 infected + 227 uninfected = 280; total male contacts = 40 infected + 218 uninfected = 258. Total contacts <20 years = 8 infected + 117 uninfected = 125 total children (includes 18 and 19 years). We collapsed adults into  $\geq 20$  years: there were 85 infected + 327 uninfected = 412 total.

- *Kim et al.*<sup>25</sup>: Of 248 household contacts, 41 had COVID-19, but 40 had the same exposure as the index case, so SAR=1/208=0.5%.
- *Liu et al.*<sup>31</sup>: There were 131 infections among 563 total spouses and 199 infections among 1878 non-spouse family members, so overall SAR = (131+199)/(563+1878) = 330/2441 = 13.5%. Contact age was reported as 0-9 years, 10-19 years, ..., which we collapsed to 0-19 and ≥20 categories (children category includes 18 and 19 years).
- *Lopez Bernal et al.*<sup>32</sup>: The article reported the household SAR as 37% for probable and confirmed cases without providing a numerator or denominator. Table 1 indicated there were 96 probable cases and 65 confirmed cases=161 total cases out of 472 household contacts, which=34.1%. Age was reported in Table 1 as <19, 19-64, ≥65, which we categorized into 0-18 and ≥19 years (children category includes 18 years).
- *Malheiro et al.*<sup>35</sup>: The SARs for the intervention and control groups were 11.6% (11/95) and 10.5% (72/685). Therefore, the overall SAR=83/780=10.6%.
- *Park, Kim et al.*<sup>37</sup>: This article reported 17 contacts of asymptomatic index patients, but Table 1 reported 15 total (4 asymptomatic and 11 pre-symptomatic). We used 15 contacts in our analysis as depicted in the table as the more conservative estimate.
- *Teherani et al.*<sup>44</sup>: Of 144 (58 children; 86 adults) household contacts, 67 developed symptoms including 31 (11 children; 20 adults) after onset of symptoms in the index case and 36 (14 children; 22 adults) before symptom onset in the index case. Therefore, the SAR from index cases=31/108=28.7% (child contact SAR=11/44=25.0%; adult contact SAR=20/64=31.3%).
- *Wu, Huang et al.*<sup>50</sup>: Contact age was reported as 0-3, 4-18, 19-60, and >61 years categories, which we collapsed into ≤18 and >18 categories (children category includes 18 years).
- *Yung et al.*<sup>54</sup>: Contact age reported as 0-4; 5-9; 10-16 years (children category does not include 17 years).

#### Other viruses:

- *Monto et al.*<sup>74</sup>: This study reported overall SARs for HCoV-NL63, HCoV-OC43, HCoV-229E, and HCoV-HKU1 for the entire study period, but did not report the overall numerator and denominator for the entire study period.
- *Ou et al.*<sup>68</sup>: This study reported SARs for household members who contacted the index case during the symptomatic period (SAR: 4.6%; 383 total) and during the incubation period (SAR: 0%; 167 total), so overall SAR=18/550=3.3%.
- *Pang et al.*<sup>69</sup>: There were 338 spouse contacts with a secondary attack rate of 15.4%, so the number of infected spouses=52. There were 635 other household contacts with a secondary attack rate of 8.8% so the number of other infected household members=59. Overall secondary attack rate=111/973=11.4%.
- *Van Kerkhove et al.*<sup>64</sup>: There were 828 total workers in 24 villas. If each villa was considered a house, there were 828/24=34.5 workers per house. There were 19 infected workers in 7 villas. Without the index cases, there were 19-7=12 infected contacts and 33.5\*7=235 total household contacts. SAR=12/235=5.1%.

### eAppendix 3. Additional Description of Studies

Household index cases were identified by passive surveillance, active surveillance of key populations (e.g., travelers from areas with active SARS-CoV-2 transmission; individuals detected by neighborhood fever screenings), and both active and passive surveillance (see eTable 3). Some studies included index cases with SARS-CoV-2 infections (both symptomatic and asymptomatic), whereas others included symptomatic COVID-19 index cases only. Another targeted asymptomatic SARS-CoV-2 infected index cases,<sup>28</sup> some of whom developed symptoms during a follow-up period. Several studies stated they assumed all secondary cases were infected by the index case to whom they were traced,<sup>27,36,50</sup> others excluded secondary cases if they developed symptoms before exposure to the primary case,<sup>13,32</sup> another excluded household contacts assessed to have the same exposure as the COVID-19 index cases,<sup>25</sup> and another randomly selected one index case as the infector.<sup>7</sup> Ignoring tertiary transmission inflates the secondary attack rate.

Many studies only included household contacts, but others included family members, or other close contacts, including individuals outside the household. We assumed that studies of household contacts included anyone living in the same household as the index case unless stated otherwise. For example, several studies reported household contacts as family members in households.<sup>6,20,47,48,55</sup> Several studies further restricted household contacts to those who spent at least one night or 24 hours in the house after symptom onset of the index case.<sup>6,25,30,48,50</sup>

Most studies involved tracing contacts and monitoring them for 14 or 21 days. Monitoring methods included phone calls,<sup>6,10,18,22,26,32,35,41</sup> text messages,<sup>10,18</sup> or direct observation by healthcare workers.<sup>33,36</sup> Some studies tested all contacts immediately after the index case was diagnosed at the onset of the observation period and monitored them for symptoms.<sup>7,11,15,20,25,28,54</sup> Others tested all contacts during or at the end of the observation period regardless of symptoms,<sup>17,27,34,37,48,51</sup> whereas others only tested symptomatic contacts (see eTable 4). One study only tested asymptomatic contacts.<sup>17</sup> Several studies tested contacts multiple times throughout the observation period irrespective of symptoms. Of those studies, several also reported extra testing of individuals who developed symptoms during quarantine.<sup>11,15,29,30,47,55</sup> Other studies tested all contacts,<sup>15,21,39,40,43,56</sup> or interviewed index cases about symptoms of household members,<sup>5,38</sup> immediately without additional monitoring. Many studies, particularly those in China, reported in-home quarantine of contacts during the observation period after index cases were confirmed.

Case ascertainment was primarily done via RT-PCR on nasopharyngeal or oropharyngeal samples. Several studies also reported whole-genome sequencing,<sup>8,47-49</sup> and nucleic acid tests.<sup>12,49,55</sup> Three studies identified index cases via RT-PCR, but only collected symptom information about household contacts from telephone interviews with index cases.<sup>5,38,44</sup>



## eAppendix 4. Additional Description of Risk Factors

### *Factors for infectiousness*

Regarding the timing of transmission, several studies reported SARS-CoV-2 transmission prior to index case symptom onset.<sup>13,24,31,55</sup> One study reported higher transmission risk after symptom onset relative to the incubation period.<sup>31</sup> Others found no significant difference in secondary transmission between contacts exposed to index cases before or after illness onset,<sup>13,30,50</sup> although close contacts were quarantined for two studies,<sup>13,30</sup> and index cases were isolated after symptom onset in the third.<sup>50</sup> Some studies reported infection risk peaked during exposure to the index case 2–4 days before or within 5 days of symptom onset.<sup>13,21,31</sup> Another reported a higher secondary attack rate among close contacts of pre-symptomatic index cases than asymptomatic carriers.<sup>13</sup>

Diarrhea,<sup>48</sup> pneumonia,<sup>5,13</sup> acute respiratory distress syndrome,<sup>13</sup> myalgia,<sup>31</sup> chills,<sup>31</sup> dizziness,<sup>31</sup> lymphocyte count,<sup>52</sup> neutrophil percentage,<sup>52</sup> and expectoration,<sup>33</sup> were associated with secondary transmission in some studies. Symptoms not shown to be associated with infectivity were fever,<sup>30,31,33,48,50,52</sup> fatigue,<sup>31,33,52</sup> dyspnea,<sup>31</sup> headache,<sup>31</sup> nasal congestion,<sup>31</sup> pharyngalgia,<sup>31</sup> arthralgia,<sup>31</sup> rhinorrhea,<sup>31</sup> nausea,<sup>31</sup> vomiting,<sup>31</sup> chest tightness,<sup>31</sup> palpitation,<sup>31</sup> poor appetite,<sup>31</sup> abdominal pain,<sup>31</sup> and white blood cell count.<sup>52</sup>

### *Awareness and behavioral factors*

Several studies explored whether prevention measures were associated with reduced transmission. Contacts who wore face masks and index cases who wore masks all the time after illness onset had lower odds of infection and transmission, respectively.<sup>17,48,51</sup> Conversely, contacts who did not apply protective measures (e.g., face mask, avoiding contact with index case) had higher odds of infection.<sup>50</sup> One study reported that greater frequency of chlorine/ethanol based disinfectant use for house cleaning and ventilation hours per day were associated with reduced risk,<sup>48</sup> whereas another did not.<sup>50</sup> Frequency of room cleaning (wet type) and hand hygiene were not significant.<sup>17,48</sup> Index case isolation after illness onset was associated with reduced secondary transmission.<sup>30</sup> Other studies did not find the time interval from illness onset to medical isolation,<sup>48</sup> hospital admission,<sup>48,50,52</sup> or laboratory confirmation,<sup>48,52</sup> to be associated with transmission. Self-awareness of being infected with SARS-CoV-2 and knowledge of COVID-19 were not significant,<sup>48</sup> but lack of knowledge of index case's own infectiousness was associated with transmission.<sup>48</sup> Health profession of the index case was a protective factor in one study.<sup>5</sup>

Physical contact,<sup>17,50</sup> and sharing a vehicle,<sup>7,31,33,50,51</sup> living room,<sup>50</sup> cigarette,<sup>17</sup> or meal,<sup>48,50</sup> were associated with infection, but eating with separate tableware was not.<sup>17,48</sup> Smoking behavior in index cases or contacts was not associated with transmission.<sup>29,50</sup>

## eReferences

1. Tsang TK, Lau LLH, Cauchemez S, Cowling BJ. Household Transmission of Influenza Virus. *Trends in Microbiology*. 2016;24(2):123-133.
2. Wells G. The Newcastle-Ottawa Scale (NOS) for assessing the quality of nonrandomised studies in meta-analysis. [http://www.ohri.ca/programs/clinical\\_epidemiology\\_oxford.htm](http://www.ohri.ca/programs/clinical_epidemiology_oxford.htm). 2004.
3. Fung HF, Martinez L, Alarid-Escudero F, et al. The household secondary attack rate of SARS-CoV-2: A rapid review. *Clinical Infectious Diseases*. 2020.
4. Adamik B, Bawiec M, Bezborodov V, et al. Bounds on the total number of SARS-CoV-2 infections: The link between severeness rate, household attack rate and the number of undetected cases. 2020.
5. Arnedo-Pena A, Sabater-Vidal S, Meseguer-Ferrer N, et al. COVID-19 secondary attack rate and risk factors in household contacts in Castellon (Spain): Preliminary report. *Enfermedades Emergentes*. 2020;19(2):64-70.
6. Bae S, Kim H, Jung T-Y, et al. Epidemiological Characteristics of COVID-19 Outbreak at Fitness Centers in Cheonan, Korea. *J Korean Med Sci*. 2020;35(31).
7. Bi Q, Wu Y, Mei S, et al. Epidemiology and transmission of COVID-19 in 391 cases and 1286 of their close contacts in Shenzhen, China: a retrospective cohort study. *The Lancet Infectious Diseases*. 2020.
8. Böhmer MM, Buchholz U, Corman VM, et al. Investigation of a COVID-19 outbreak in Germany resulting from a single travel-associated primary case: a case series. *The Lancet Infectious Diseases*. 2020.
9. Boscolo-Rizzo P, Borsetto D, Spinato G, et al. New onset of loss of smell or taste in household contacts of home-isolated SARS-CoV-2-positive subjects. *European Archives of Oto-rhino-laryngology*. 2020:1-4.
10. Burke RM. Active monitoring of persons exposed to patients with confirmed COVID-19—United States, January–February 2020. *MMWR Morbidity and mortality weekly report*. 2020;69.
11. Chaw L, Koh WC, Jamaludin SA, Naing L, Alikhan MF, Wong J. SARS-CoV-2 transmission in different settings: Analysis of cases and close contacts from the Tablighi cluster in Brunei Darussalam. *medRxiv*. 2020.
12. Chen Y, Wang AH, Yi B, et al. [Epidemiological characteristics of infection in COVID-19 close contacts in Ningbo city]. *Zhonghua Liu Xing Bing Xue Za Zhi*. 2020;41(5):667-671.
13. Cheng HY, Jian SW, Liu DP, Ng TC, Huang WT, Lin HH. Contact Tracing Assessment of COVID-19 Transmission Dynamics in Taiwan and Risk at Different Exposure Periods Before and After Symptom Onset. *JAMA Internal Medicine*. 2020.
14. Dattner I, Goldberg Y, Katriel G, et al. The role of children in the spread of COVID-19: Using household data from Bnei Brak, Israel, to estimate the relative susceptibility and infectivity of children. *medRxiv*. 2020.
15. Dawson P, Rabold EM, Laws RL, et al. Loss of Taste and Smell as Distinguishing Symptoms of COVID-19. *Clinical Infectious Diseases*. 2020.
16. Dong XC, Li JM, Bai JY, et al. [Epidemiological characteristics of confirmed COVID-19 cases in Tianjin]. *Zhonghua Liu Xing Bing Xue Za Zhi*. 2020;41(5):638-641.
17. Doung-ngern P, Suphanchaimat R, Panjagampathana A, et al. Case-Control Study of Use of Personal Protective Measures and Risk for Severe Acute Respiratory Syndrome Coronavirus 2 Infection, Thailand. *Emerging Infectious Diseases*. 2020;26(11).
18. Draper AD, Dempsey KE, Boyd RH, et al. The first 2 months of COVID-19 contact tracing in the Northern Territory of Australia, March-April 2020. *Communicable Diseases Intelligence*. 2020;44.
19. Fateh-Moghadam P, Battisti L, Molinaro S, et al. Contact tracing during Phase I of the COVID-19 pandemic in the Province of Trento, Italy: key findings and recommendations. *medRxiv*. 2020.
20. Han T. Outbreak investigation: transmission of COVID-19 starting from a spa facility in a local community in Korea. *Epidemiology and Health*. 2020;0(0):e2020056-2020050.
21. Hu S, Wang W, Wang Y, et al. Infectivity, susceptibility, and risk factors associated with SARS-CoV-2 transmission under intensive contact tracing in Hunan, China. *medRxiv*. 2020.
22. Hua CZ, Miao ZP, Zheng JS, et al. Epidemiological features and viral shedding in children with SARS-CoV-2 infection. *Journal of Medical Virology*. 2020.
23. Islam SS, Noman ASM. Transmission Dynamics and Contact Tracing Assessment of COVID-19 in Chattogram, Bangladesh and Potential Risk of Close Contacts at Different Exposure Settings. *Bangladesh and Potential Risk of Close Contacts at Different Exposure Settings*.
24. Jing Q-L, Liu M-J, Yuan J, et al. Household secondary attack rate of COVID-19 and associated determinants in Guangzhou, China: a retrospective cohort study. *The Lancet Infectious Diseases*. 2020.

25. Kim J, Choe YJ, Lee J, et al. Role of children in household transmission of COVID-19. *Archives of Disease in Childhood*. 2020:archdischild-2020-319910.
26. Coronavirus Disease-19: Summary of 2,370 Contact Investigations of the First 30 Cases in the Republic of Korea. *Osong Public Health and Research Perspectives*. 2020;11(2):81-84.
27. Laxminarayan R, Wahl B, Dudala SR, et al. Epidemiology and transmission dynamics of COVID-19 in two Indian states. *Science*. 2020.
28. Lee M, Eun Y, Park K, Heo J, Son H. Follow up investigation of asymptomatic COVID-19 cases at diagnosis in Busan, Korea. *Epidemiology and Health*. 2020;0(0):e2020046-2020040.
29. Lewis NM, Chu VT, Ye D, et al. Household transmission of SARS-CoV-2 in the United States. *Clinical Infectious Diseases*. 2020.
30. Li W, Zhang B, Lu J, et al. The characteristics of household transmission of COVID-19. *Clinical Infectious Diseases*. 2020.
31. Liu T, Liang W, Zhong H, et al. Risk factors associated with COVID-19 infection: a retrospective cohort study based on contacts tracing. *Emerging Microbes & Infections*. 2020:1-31.
32. Lopez Bernal J, Panagiotopoulos N, Byers C, et al. Transmission dynamics of COVID-19 in household and community settings in the United Kingdom. *medRxiv*. 2020:2020.2008.2019.20177188.
33. Luo L, Liu D, Liao X, et al. Contact Settings and Risk for Transmission in 3410 Close Contacts of Patients With COVID-19 in Guangzhou, China: A Prospective Cohort Study. *Ann Intern Med*. 2020.
34. Lynge FP, Kirkeby CT, Halasa T, et al. COVID-19 Transmission Within Danish Households: A Nationwide Study from Lockdown to Reopening. *medRxiv*. 2020.
35. Malheiro R, Figueiredo AL, Magalhães JP, et al. Effectiveness of contact tracing and quarantine on reducing COVID-19 transmission: a retrospective cohort study. *Public Health*. 2020.
36. Park YJ, Choe YJ, Park O, et al. Contact Tracing during Coronavirus Disease Outbreak, South Korea, 2020. *Emerging Infectious Diseases*. 2020;26(10).
37. Park SY, Kim Y-M, Yi S, et al. Coronavirus Disease Outbreak in Call Center, South Korea. *Emerging Infectious Diseases*. 2020;26(8).
38. Patel A, Charani E, Ariyanayagam D, et al. New-onset anosmia and ageusia in adult patients diagnosed with SARS-CoV-2 infection. *Clinical Microbiology and Infection*. 2020.
39. Phiriyasart F, Chantutanon S, Salaeh F, et al. Outbreak Investigation of Coronavirus Disease (COVID-19) among Islamic Missionaries in Southern Thailand, April 2020. *OSIR Journal*. 2020;13(2).
40. Rosenberg ES, Dufort EM, Blog DS, et al. COVID-19 Testing, Epidemic Features, Hospital Outcomes, and Household Prevalence, New York State-March 2020. *Clinical Infectious Diseases*. 2020.
41. Shah K, Desai N, Saxena D, Mavalankar D, Mishra U, Patel GC. Household Secondary Attack Rate in Gandhinagar district of Gujarat state from Western India. *medRxiv*. 2020:2020.2009.2003.20187336.
42. Son H, Lee H, Lee M, et al. Epidemiological characteristics of and containment measures for coronavirus disease 2019 in Busan Metropolitan City, South Korea. *Epidemiology and Health*. 2020:e2020035.
43. Sun WW, Ling F, Pan JR, et al. [Epidemiological characteristics of 2019 novel coronavirus family clustering in Zhejiang Province]. *Zhonghua Yu Fang Yi Xue Za Zhi*. 2020;54(0):E027.
44. Teherani MF, Kao CM, Camacho-Gonzalez A, et al. Burden of illness in households with SARS-CoV-2 infected children. *Journal of the Pediatric Infectious Diseases Society*. 2020.
45. van der Hoek W, Backer JA, Bodewes R, et al. [The role of children in the transmission of SARS-CoV-2]. *Nederlands tijdschrift voor geneeskunde*. 2020;164.
46. Wang Z, Ma W, Zheng X, Wu G, Zhang R. Household transmission of SARS-CoV-2. *The Journal of Infection*. 2020.
47. Wang X, Pan Y, Zhang D, et al. Basic epidemiological parameter values from data of real-world in mega-cities: the characteristics of COVID-19 in Beijing, China. *BMC Infectious Diseases*. 2020;20(1):526.
48. Wang Y, Tian H, Zhang L, et al. Reduction of secondary transmission of SARS-CoV-2 in households by face mask use, disinfection and social distancing: a cohort study in Beijing, China. *BMJ Global Health*. 2020;5(5):e002794.
49. Wang X, Zhou Q, He Y, et al. Nosocomial outbreak of COVID-19 pneumonia in Wuhan, China. *The European Respiratory Journal*. 2020;55(6).
50. Wu J, Huang Y, Tu C, et al. Household Transmission of SARS-CoV-2, Zhuhai, China, 2020. *Clinical Infectious Diseases*. 2020.
51. Wu Y, Song S, Kao Q, Kong Q, Sun Z, Wang B. Risk of SARS-CoV-2 infection among contacts of individuals with COVID-19 in Hangzhou, China. *Public Health*. 2020;185:57-59.

52. Xin H, Jiang F, Xue A, et al. Risk factors associated with occurrence of COVID-19 among household persons exposed to patients with confirmed COVID-19 in Qingdao Municipal, China. *Transboundary and Emerging Diseases*. 2020.
53. Yu HJ, Hu YF, Liu XX, et al. Household infection: The predominant risk factor for close contacts of patients with COVID-19. *Travel Medicine and Infectious Disease*. 2020;36:101809.
54. Yung CF, Kam KQ, Chong CY, et al. Household Transmission of SARS-CoV-2 from Adults to Children. *The Journal of Pediatrics*. 2020.
55. Zhang W, Cheng W, Luo L, et al. Secondary Transmission of Coronavirus Disease from Presymptomatic Persons, China. *Emerging Infectious Diseases*. 2020;26(8).
56. Zhang JZ, Zhou P, Han DB, et al. [Investigation on a cluster epidemic of COVID-19 in a supermarket in Liaocheng, Shandong province]. *Zhonghua Liu Xing Bing Xue Za Zhi*. 2020;41(0):E055.
57. Zhuang YL, Zhang YT, Li M, et al. [Analysis on the cluster epidemic of coronavirus disease 2019 in Guangdong Province]. *Zhonghua Yu Fang Yi Xue Za Zhi*. 2020;54(7):720-725.
58. Al Hosani FI, Kim L, Khudhair A, et al. Serologic Follow-up of Middle East Respiratory Syndrome Coronavirus Cases and Contacts-Abu Dhabi, United Arab Emirates. *Clinical Infectious Diseases*. 2019;68(3):409-418.
59. Arwady MA, Alraddadi B, Basler C, et al. Middle East respiratory syndrome coronavirus transmission in extended family, Saudi Arabia, 2014. *Emerging Infectious Diseases*. 2016;22(8):1395.
60. Assiri A, McGeer A, Perl TM, et al. Hospital outbreak of Middle East respiratory syndrome coronavirus. *The New England Journal of Medicine*. 2013;369(5):407-416.
61. Drosten C, Meyer B, Müller MA, et al. Transmission of MERS-coronavirus in household contacts. *New England Journal of Medicine*. 2014;371(9):828-835.
62. Memish ZA, Al-Tawfiq JA, Alhakeem RF, et al. Middle East respiratory syndrome coronavirus (MERS-CoV): A cluster analysis with implications for global management of suspected cases. *Travel Medicine and Infectious Disease*. 2015;13(4):311-314.
63. Payne DC, Biggs HM, Al-Abdallat MM, et al. Multihospital Outbreak of a Middle East Respiratory Syndrome Coronavirus Deletion Variant, Jordan: A Molecular, Serologic, and Epidemiologic Investigation. *Open Forum Infectious Diseases*. 2018;5(5):ofy095.
64. Van Kerkhove MD, Alaswad S, Assiri A, et al. Transmissibility of MERS-CoV infection in closed setting, Riyadh, Saudi Arabia, 2015. *Emerging Infectious Diseases*. 2019;25(10):1802.
65. Chan LY, Wong JT, Li PK, Lui SF, Fung H, Sung J. Risk of transmission of severe acute respiratory syndrome to household contacts by infected health care workers and patients. *The American Journal of Medicine*. 2004;116(8):559-560.
66. Goh DL, Lee BW, Chia KS, et al. Secondary household transmission of SARS, Singapore. *Emerg Infect Dis*. 2004;10(2):232-234.
67. Lau JT, Lau M, Kim JH, Tsui HY, Tsang T, Wong TW. Probable secondary infections in households of SARS patients in Hong Kong. *Emerg Infect Dis*. 2004;10(2):235-243.
68. Ou J, Li Q, Zeng G, Dun Z. Efficiency of quarantine during an epidemic of severe acute respiratory syndrome-Beijing, China, 2003. *MMWR: Morbidity & Mortality Weekly Report*. 2003;52(43):1037-1037.
69. Pang X, Zhu Z, Xu F, et al. Evaluation of control measures implemented in the severe acute respiratory syndrome outbreak in Beijing, 2003. *Jama*. 2003;290(24):3215-3221.
70. Tuan PA, Horby P, Dinh PN, et al. SARS transmission in Vietnam outside of the health-care setting. *Epidemiology and Infection*. 2007;135(3):392-401.
71. Wilson-Clark SD, Deeks SL, Gournis E, et al. Household transmission of SARS, 2003. *Canadian Medical Association Journal*. 2006;175(10):1219-1223.
72. Beale S, Lewer D, Aldridge RW, et al. Household transmission of seasonal coronavirus infections: Results from the Flu Watch cohort study. *Wellcome Open Research*. 2020;5(145):145.
73. Esposito S, Bosis S, Niesters HG, et al. Impact of human coronavirus infections in otherwise healthy children who attended an emergency department. *Journal of Medical Virology*. 2006;78(12):1609-1615.
74. Monto AS, DeJonge P, Callear AP, et al. Coronavirus occurrence and transmission over 8 years in the HIVE cohort of households in Michigan. *The Journal of Infectious Diseases*. 2020.
75. Hou H, Wang T, Zhang B, et al. Detection of IgM and IgG antibodies in patients with coronavirus disease 2019. *Clinical & Translational Immunology*. 2020;9(5):e1136.
